# Supplementary material for: Sodium Levels in Packaged Foods Sold in 14 Latin American and Caribbean Countries: A Food Label Analysis
Source: PubMed Central journal article supplement (PMC6412284; doi:10.3390/nu11020369), 2019-02-11
Supplement: nutrients-11-00369-s001.pdf [file nutrients-11-00369-s001.pdf]

## Supplementary Materials

### Sodium levels in packaged foods sold in 14 Latin American and Caribbean countries: A food label analysis

#### Table of Contents

|                                                                                                                              |    |
|------------------------------------------------------------------------------------------------------------------------------|----|
| Table S1. Number of packaged foods by Food Category and by Country .....                                                     | 2  |
| Table S2. Detailed assessment of sodium levels in packaged foods by Food Category.....                                       | 3  |
| Table S3. Detailed assessment sodium levels in packaged foods by Country.....                                                | 11 |
| Table S4. Detailed assessment of the proportion of foods meeting the Regional Sodium Reduction Targets by Food Category..... | 19 |
| Table S5. Detailed assessment of the proportion of foods meeting the Regional Sodium Targets by Country .....                | 30 |

**Table S1. Number of packaged foods by Food Category and by Country**

|                            | Soup        | Meat        | Bread       | Mayonnaise | Cookies and Biscuits | Cakes       | Breakfast Cereals | Cheese      | Butter     | Snacks      | Pasta      | Condiments  | Total        |
|----------------------------|-------------|-------------|-------------|------------|----------------------|-------------|-------------------|-------------|------------|-------------|------------|-------------|--------------|
| <b>Argentina</b>           | 79          | 212         | 123         | 18         | 165                  | 127         | 88                | 150         | 23         | 123         | 96         | 71          | <b>1275</b>  |
| <b>Brazil</b>              | 80          | 200         | 101         | 33         | 150                  | 154         | 100               | 158         | 50         | 198         | 51         | 107         | <b>1382</b>  |
| <b>Chile</b>               | 81          | 219         | 106         | 30         | 152                  | 157         | 109               | 150         | 50         | 132         | 57         | 85          | <b>1328</b>  |
| <b>Costa Rica</b>          | 84          | 101         | 83          | 34         | 170                  | 117         | 115               | 138         | 43         | 206         | 48         | 85          | <b>1224</b>  |
| <b>Cuba</b>                | 17          | 34          | 24          | 6          | 29                   | 8           | 23                | 32          | 1          | 14          | 30         | 23          | <b>241</b>   |
| <b>Ecuador</b>             | 60          | 221         | 106         | 26         | 184                  | 135         | 100               | 136         | 32         | 187         | 50         | 76          | <b>1313</b>  |
| <b>Guatemala</b>           | 79          | 60          | 68          | 29         | 147                  | 96          | 100               | 164         | 68         | 181         | 66         | 50          | <b>1108</b>  |
| <b>Jamaica</b>             | 90          | 100         | 72          | 11         | 171                  | 75          | 114               | 144         | 30         | 147         | 31         | 66          | <b>1051</b>  |
| <b>Mexico</b>              | 80          | 214         | 112         | 37         | 172                  | 121         | 104               | 157         | 46         | 211         | 46         | 124         | <b>1424</b>  |
| <b>Panama</b>              | 71          | 187         | 137         | 25         | 199                  | 129         | 190               | 170         | 51         | 207         | 64         | 79          | <b>1509</b>  |
| <b>Paraguay</b>            | 31          | 129         | 76          | 18         | 148                  | 35          | 98                | 110         | 17         | 159         | 120        | 40          | <b>981</b>   |
| <b>Peru</b>                | 94          | 49          | 68          | 20         | 129                  | 33          | 91                | 73          | 18         | 116         | 73         | 86          | <b>850</b>   |
| <b>Trinidad and Tobago</b> | 98          | 179         | 95          | 20         | 193                  | 127         | 112               | 177         | 28         | 152         | 60         | 77          | <b>1318</b>  |
| <b>Barbados</b>            | 80          | 166         | 100         | 30         | 160                  | 129         | 113               | 152         | 50         | 202         | 57         | 114         | <b>1353</b>  |
| <b>Total</b>               | <b>1024</b> | <b>2071</b> | <b>1271</b> | <b>337</b> | <b>2169</b>          | <b>1443</b> | <b>1457</b>       | <b>1911</b> | <b>507</b> | <b>2235</b> | <b>849</b> | <b>1083</b> | <b>16357</b> |

**Table S2. Detailed assessment of sodium levels in packaged foods by Food Category**

|                     | n           | Average Sodium (mg/serving) | Average Sodium   | Sodium Percentiles (mg/100g) |                  |                  |                  |                  |             |
|---------------------|-------------|-----------------------------|------------------|------------------------------|------------------|------------------|------------------|------------------|-------------|
|                     |             |                             | (mg/100g)        | Min                          | 10 <sup>th</sup> | 25 <sup>th</sup> | 50 <sup>th</sup> | 75 <sup>th</sup> | Max         |
| <b>Soups</b>        | <b>1024</b> | <b>163 ± 160</b>            | <b>402 ± 469</b> | <b>0</b>                     | <b>115</b>       | <b>240</b>       | <b>332</b>       | <b>440</b>       | <b>5900</b> |
| Argentina           | 79          | 204 ± 341                   | 884 ± 1417       | 2                            | 25               | 247              | 327              | 964              | 5900        |
| Brazil              | 80          | 110 ± 86                    | 310 ± 203        | 1                            | 71               | 119              | 309              | 421              | 794         |
| Chile               | 81          | 101 ± 85                    | 244 ± 125        | 35                           | 71               | 154              | 205              | 366              | 439         |
| Costa Rica          | 84          | 178 ± 144                   | 417 ± 206        | 17                           | 170              | 276              | 370              | 640              | 737         |
| Cuba                | 17          | 35 ± 36                     | 150 ± 139        | 15                           | 30               | 86               | 94               | 124              | 460         |
| Ecuador             | 60          | 184 ± 169                   | 548 ± 260        | 3                            | 274              | 387              | 533              | 760              | 1368        |
| Guatemala           | 79          | 240 ± 195                   | 422 ± 157        | 90                           | 264              | 314              | 370              | 538              | 754         |
| Jamaica             | 90          | 190 ± 122                   | 420 ± 407        | 0                            | 181              | 251              | 329              | 421              | 3467        |
| Mexico              | 80          | 129 ± 111                   | 268 ± 230        | 12                           | 19               | 35               | 193              | 412              | 796         |
| Panama              | 71          | 137 ± 112                   | 341 ± 109        | 54                           | 195              | 293              | 317              | 391              | 607         |
| Paraguay            | 31          | 95 ± 91                     | 333 ± 143        | 205                          | 230              | 257              | 295              | 306              | 766         |
| Peru                | 94          | 164 ± 110                   | 339 ± 114        | 18                           | 245              | 280              | 330              | 382              | 885         |
| Trinidad and Tobago | 98          | 203 ± 130                   | 403 ± 176        | 43                           | 189              | 281              | 372              | 527              | 771         |
| Barbados            | 80          | 162 ± 128                   | 355 ± 204        | 13                           | 165              | 238              | 285              | 429              | 1053        |
|                     |             |                             |                  |                              |                  |                  |                  |                  |             |
| <b>Meat</b>         | <b>2071</b> | <b>496 ± 414</b>            | <b>928 ± 569</b> | <b>0</b>                     | <b>389</b>       | <b>650</b>       | <b>870</b>       | <b>1091</b>      | <b>7000</b> |
| Argentina           | 212         | 468 ± 271                   | 979 ± 559        | 30                           | 457              | 700              | 850              | 1088             | 3500        |
| Brazil              | 200         | 575 ± 240                   | 1044 ± 388       | 274                          | 617              | 812              | 1035             | 1226             | 3070        |
| Chile               | 219         | 409 ± 255                   | 995 ± 435        | 70                           | 475              | 759              | 929              | 1144             | 2630        |
| Costa Rica          | 101         | 605 ± 567                   | 926 ± 611        | 31                           | 406              | 511              | 827              | 1127             | 4200        |
| Cuba                | 34          | 1086 ± 837                  | 773 ± 478        | 95                           | 116              | 428              | 780              | 908              | 1960        |
| Ecuador             | 221         | 468 ± 288                   | 992 ± 584        | 55                           | 564              | 745              | 982              | 1120             | 6600        |
| Guatemala           | 60          | 739 ± 1519                  | 1067 ± 1003      | 0                            | 1                | 700              | 940              | 1214             | 4500        |

Supplementary Materials for “Sodium levels in packaged foods sold in 14 Latin American and Caribbean countries”

|                     | n           | Average Sodium (mg/serving) | Average Sodium   | Sodium Percentiles (mg/100g) |                  |                  |                  |                  |             |
|---------------------|-------------|-----------------------------|------------------|------------------------------|------------------|------------------|------------------|------------------|-------------|
|                     |             |                             | (mg/100g)        | Min                          | 10 <sup>th</sup> | 25 <sup>th</sup> | 50 <sup>th</sup> | 75 <sup>th</sup> | Max         |
| Jamaica             | 100         | 499 ± 250                   | 788 ± 310        | 47                           | 400              | 632              | 810              | 982              | 1760        |
| Mexico              | 214         | 627 ± 464                   | 969 ± 528        | 114                          | 450              | 691              | 900              | 1068             | 4545        |
| Panama              | 187         | 453 ± 233                   | 770 ± 688        | 12                           | 140              | 420              | 720              | 905              | 5730        |
| Paraguay            | 129         | 347 ± 214                   | 793 ± 450        | 0                            | 339              | 542              | 725              | 990              | 3000        |
| Peru                | 49          | 315 ± 325                   | 748 ± 1129       | 0                            | 0                | 72               | 560              | 959              | 7000        |
| Trinidad and Tobago | 179         | 497 ± 443                   | 868 ± 584        | 54                           | 408              | 447              | 804              | 1035             | 4955        |
| Barbados            | 166         | 428 ± 157                   | 961 ± 429        | 0                            | 560              | 713              | 855              | 1110             | 2320        |
|                     |             |                             |                  |                              |                  |                  |                  |                  |             |
| <b>Bread</b>        | <b>1271</b> | <b>208 ± 148</b>            | <b>465 ± 284</b> | <b>0</b>                     | <b>190</b>       | <b>350</b>       | <b>458</b>       | <b>543</b>       | <b>4444</b> |
| Argentina           | 123         | 208 ± 146                   | 452 ± 255        | 0                            | 81               | 279              | 480              | 609              | 1200        |
| Brazil              | 101         | 198 ± 51                    | 417 ± 128        | 168                          | 270              | 326              | 414              | 484              | 847         |
| Chile               | 106         | 227 ± 89                    | 428 ± 140        | 7                            | 272              | 365              | 413              | 491              | 984         |
| Costa Rica          | 83          | 232 ± 251                   | 435 ± 314        | 0                            | 0                | 215              | 473              | 591              | 1240        |
| Cuba                | 24          | 312 ± 137                   | 542 ± 76         | 381                          | 473              | 479              | 528              | 601              | 696         |
| Ecuador             | 106         | 192 ± 136                   | 421 ± 200        | 0                            | 123              | 329              | 427              | 520              | 1023        |
| Guatemala           | 68          | 201 ± 159                   | 519 ± 702        | 0                            | 38               | 281              | 457              | 540              | 4444        |
| Jamaica             | 72          | 257 ± 160                   | 465 ± 137        | 0                            | 298              | 415              | 481              | 516              | 969         |
| Mexico              | 112         | 167 ± 122                   | 603 ± 448        | 0                            | 317              | 376              | 475              | 728              | 4000        |
| Panama              | 137         | 178 ± 98                    | 531 ± 221        | 10                           | 320              | 440              | 500              | 610              | 1270        |
| Paraguay            | 76          | 165 ± 78                    | 398 ± 199        | 0                            | 86               | 299              | 439              | 536              | 913         |
| Peru                | 68          | 286 ± 281                   | 503 ± 249        | 1                            | 222              | 404              | 486              | 590              | 1300        |
| Trinidad and Tobago | 95          | 226 ± 138                   | 421 ± 171        | 0                            | 202              | 350              | 450              | 510              | 1000        |
| Barbados            | 100         | 211 ± 106                   | 403 ± 134        | 0                            | 227              | 343              | 410              | 461              | 740         |
|                     |             |                             |                  |                              |                  |                  |                  |                  |             |
| <b>Mayonnaise</b>   | <b>337</b>  | <b>111 ± 80</b>             | <b>751 ± 295</b> | <b>0</b>                     | <b>470</b>       | <b>570.67</b>    | <b>754.55</b>    | <b>892.86</b>    | <b>4000</b> |
| Argentina           | 18          | 107 ± 26                    | 856 ± 145        | 558                          | 622              | 786              | 903              | 948              | 1067        |

Supplementary Materials for “Sodium levels in packaged foods sold in 14 Latin American and Caribbean countries”

|                             | n           | Average Sodium (mg/serving) | Average Sodium   | Sodium Percentiles (mg/100g) |                  |                  |                  |                  |             |
|-----------------------------|-------------|-----------------------------|------------------|------------------------------|------------------|------------------|------------------|------------------|-------------|
|                             |             |                             | (mg/100g)        | Min                          | 10 <sup>th</sup> | 25 <sup>th</sup> | 50 <sup>th</sup> | 75 <sup>th</sup> | Max         |
| Brazil                      | 33          | 107 ± 24                    | 881 ± 208        | 375                          | 545              | 792              | 975              | 1025             | 1100        |
| Chile                       | 30          | 96 ± 25                     | 759 ± 187        | 400                          | 547              | 627              | 769              | 921              | 1031        |
| Costa Rica                  | 34          | 114 ± 26                    | 754 ± 162        | 373                          | 493              | 617              | 833              | 867              | 933         |
| Cuba                        | 6           | 80 ± 33                     | 525 ± 140        | 354                          | 374              | 413              | 531              | 633              | 696         |
| Ecuador                     | 26          | 106 ± 142                   | 559 ± 206        | 11                           | 393              | 438              | 539              | 643              | 1133        |
| Guatemala                   | 29          | 101 ± 37                    | 702 ± 272        | 36                           | 469              | 533              | 733              | 867              | 1250        |
| Jamaica                     | 11          | 84 ± 27                     | 571 ± 165        | 333                          | 393              | 393              | 633              | 706              | 767         |
| Mexico                      | 37          | 176 ± 182                   | 763 ± 186        | 505                          | 551              | 600              | 733              | 867              | 505         |
| Panama                      | 25          | 105 ± 25                    | 745 ± 213        | 370                          | 490              | 627              | 770              | 870              | 1400        |
| Paraguay                    | 18          | 109 ± 16                    | 915 ± 120        | 610                          | 741              | 883              | 942              | 988              | 1075        |
| Peru                        | 20          | 107 ± 58                    | 789 ± 388        | 96                           | 344              | 598              | 733              | 1000             | 2000        |
| Trinidad and Tobago         | 20          | 88 ± 43                     | 594 ± 298        | 0                            | 303              | 400              | 647              | 713              | 1400        |
| Barbados                    | 30          | 105 ± 30                    | 826 ± 626        | 500                          | 518              | 600              | 670              | 800              | 4000        |
|                             |             |                             |                  |                              |                  |                  |                  |                  |             |
| <b>Cookies and Biscuits</b> | <b>2169</b> | <b>113 ± 94</b>             | <b>391 ± 296</b> | <b>0</b>                     | <b>111</b>       | <b>199</b>       | <b>315</b>       | <b>500</b>       | <b>3433</b> |
| Argentina                   | 165         | 116 ± 113                   | 377 ± 374        | 0                            | 75               | 133              | 288              | 553              | 3433        |
| Brazil                      | 150         | 108 ± 72                    | 356 ± 227        | 63                           | 173              | 208              | 294              | 417              | 1443        |
| Chile                       | 152         | 80 ± 63                     | 265 ± 198        | 6                            | 95               | 130              | 228              | 331              | 1367        |
| Costa Rica                  | 170         | 122 ± 108                   | 437 ± 343        | 0                            | 139              | 215              | 318              | 560              | 1929        |
| Cuba                        | 29          | 42 ± 41                     | 230 ± 173        | 16                           | 43               | 43               | 197              | 306              | 700         |
| Ecuador                     | 184         | 87 ± 78                     | 309 ± 256        | 0                            | 33               | 120              | 250              | 437              | 1250        |
| Guatemala                   | 147         | 123 ± 129                   | 457 ± 421        | 0                            | 100              | 188              | 336              | 611              | 2400        |
| Jamaica                     | 171         | 142 ± 86                    | 460 ± 241        | 86                           | 197              | 299              | 400              | 606              | 1300        |
| Mexico                      | 172         | 100 ± 86                    | 357 ± 288        | 0                            | 57               | 165              | 283              | 448              | 1433        |
| Panama                      | 199         | 131 ± 86                    | 479 ± 304        | 0                            | 140              | 235              | 390              | 695              | 1640        |

Supplementary Materials for “Sodium levels in packaged foods sold in 14 Latin American and Caribbean countries”

|                          | n           | Average Sodium (mg/serving) | Average Sodium   | Sodium Percentiles (mg/100g) |                  |                  |                  |                  |             |
|--------------------------|-------------|-----------------------------|------------------|------------------------------|------------------|------------------|------------------|------------------|-------------|
|                          |             |                             | (mg/100g)        | Min                          | 10 <sup>th</sup> | 25 <sup>th</sup> | 50 <sup>th</sup> | 75 <sup>th</sup> | Max         |
| Paraguay                 | 148         | 88 ± 64                     | 319 ± 211        | 0                            | 134              | 199              | 266              | 374              | 1197        |
| Peru                     | 129         | 149 ± 99                    | 432 ± 280        | 0                            | 165              | 239              | 340              | 620              | 1643        |
| Trinidad and Tobago      | 193         | 111 ± 109                   | 393 ± 274        | 0                            | 170              | 230              | 340              | 470              | 2270        |
| Barbados                 | 160         | 130 ± 82                    | 451 ± 270        | 10                           | 178              | 278              | 380              | 603              | 1670        |
|                          |             |                             |                  |                              |                  |                  |                  |                  |             |
| <b>Cakes</b>             | <b>1443</b> | <b>191 ± 129</b>            | <b>383 ± 251</b> | <b>0</b>                     | <b>120</b>       | <b>210</b>       | <b>328</b>       | <b>520</b>       | <b>2743</b> |
| Argentina                | 127         | 146 ± 91                    | 323 ± 204        | 3                            | 81               | 214              | 260              | 435              | 820         |
| Brazil                   | 154         | 133 ± 53                    | 324 ± 153        | 55                           | 144              | 200              | 315              | 443              | 860         |
| Chile                    | 157         | 149 ± 110                   | 231 ± 180        | 21                           | 73               | 113              | 183              | 313              | 1460        |
| Costa Rica               | 117         | 180 ± 114                   | 385 ± 244        | 22                           | 132              | 195              | 297              | 572              | 971         |
| Cuba                     | 8           | 65 ± 31                     | 225 ± 84         | 75                           | 132              | 198              | 214              | 303              | 320         |
| Ecuador                  | 135         | 192 ± 230                   | 331 ± 333        | 0                            | 50               | 148              | 258              | 430              | 2743        |
| Guatemala                | 96          | 212 ± 115                   | 470 ± 273        | 22                           | 165              | 253              | 402              | 701              | 1483        |
| Jamaica                  | 75          | 302 ± 93                    | 540 ± 224        | 125                          | 267              | 330              | 595              | 721              | 947         |
| Mexico                   | 121         | 171 ± 132                   | 369 ± 232        | 0                            | 143              | 238              | 324              | 438              | 1371        |
| Panama                   | 129         | 222 ± 121                   | 405 ± 235        | 0                            | 124              | 270              | 380              | 530              | 1130        |
| Paraguay                 | 35          | 198 ± 92                    | 472 ± 176        | 120                          | 200              | 368              | 496              | 577              | 765         |
| Peru                     | 33          | 172 ± 134                   | 425 ± 301        | 0                            | 104              | 200              | 677              | 104              | 1465        |
| Trinidad and Tobago      | 127         | 240 ± 102                   | 433 ± 255        | 80                           | 190              | 260              | 330              | 660              | 1580        |
| Barbados                 | 129         | 235 ± 96                    | 505 ± 258        | 40                           | 200              | 300              | 420              | 720              | 1250        |
|                          |             |                             |                  |                              |                  |                  |                  |                  |             |
| <b>Breakfast Cereals</b> | <b>1457</b> | <b>110 ± 94</b>             | <b>334 ± 280</b> | <b>0</b>                     | <b>11</b>        | <b>113</b>       | <b>327</b>       | <b>486</b>       | <b>3400</b> |
| Argentina                | 88          | 95 ± 76                     | 318 ± 253        | 0                            | 46               | 113              | 277              | 518              | 1100        |
| Brazil                   | 100         | 73 ± 66                     | 224 ± 217        | 0                            | 18               | 76               | 166              | 327              | 1500        |
| Chile                    | 109         | 69 ± 57                     | 213 ± 175        | 1                            | 7                | 50               | 188              | 324              | 642         |

Supplementary Materials for “Sodium levels in packaged foods sold in 14 Latin American and Caribbean countries”

|                     | n           | Average Sodium (mg/serving) | Average Sodium   | Sodium Percentiles (mg/100g) |                  |                  |                  |                  |              |
|---------------------|-------------|-----------------------------|------------------|------------------------------|------------------|------------------|------------------|------------------|--------------|
|                     |             |                             | (mg/100g)        | Min                          | 10 <sup>th</sup> | 25 <sup>th</sup> | 50 <sup>th</sup> | 75 <sup>th</sup> | Max          |
| Costa Rica          | 115         | 140 ± 63                    | 433 ± 185        | 44                           | 240              | 315              | 400              | 550              | 1067         |
| Cuba                | 23          | 175 ± 178                   | 602 ± 708        | 0                            | 150              | 297              | 450              | 568              | 2760         |
| Ecuador             | 100         | 84 ± 149                    | 283 ± 498        | 0                            | 0                | 19               | 200              | 384              | 3400         |
| Guatemala           | 100         | 133 ± 56                    | 412 ± 188        | 0                            | 183              | 300              | 433              | 533              | 800          |
| Jamaica             | 114         | 168 ± 93                    | 456 ± 223        | 0                            | 141              | 335              | 457              | 575              | 1179         |
| Mexico              | 104         | 103 ± 65                    | 323 ± 204        | 0                            | 27               | 99               | 356              | 467              | 1073         |
| Panama              | 190         | 118 ± 69                    | 344 ± 201        | 0                            | 10               | 220              | 355              | 493              | 810          |
| Paraguay            | 98          | 60 ± 63                     | 201 ± 210        | 0                            | 12               | 69               | 125              | 269              | 977          |
| Peru                | 91          | 72 ± 91                     | 251 ± 276        | 0                            | 2                | 7                | 229              | 378              | 1395         |
| Trinidad and Tobago | 112         | 147 ± 130                   | 406 ± 245        | 0                            | 85               | 265              | 388              | 534              | 1280         |
| Barbados            | 113         | 122 ± 97                    | 356 ± 316        | 0                            | 10               | 70               | 370              | 510              | 1680         |
|                     |             |                             |                  |                              |                  |                  |                  |                  |              |
| <b>Cheese</b>       | <b>1911</b> | <b>196 ± 172</b>            | <b>739 ± 715</b> | <b>0</b>                     | <b>274</b>       | <b>450</b>       | <b>643</b>       | <b>867</b>       | <b>14740</b> |
| Argentina           | 150         | 194 ± 108                   | 679 ± 731        | 27                           | 236              | 467              | 583              | 803              | 8800         |
| Brazil              | 158         | 200 ± 116                   | 664 ± 400        | 50                           | 327              | 400              | 562              | 830              | 3000         |
| Chile               | 150         | 144 ± 82                    | 603 ± 396        | 42                           | 261              | 340              | 482              | 795              | 2230         |
| Costa Rica          | 138         | 282 ± 412                   | 842 ± 845        | 0                            | 300              | 500              | 627              | 960              | 6800         |
| Cuba                | 32          | 162 ± 14                    | 838 ± 439        | 39                           | 339              | 405              | 900              | 1122             | 1930         |
| Ecuador             | 136         | 178 ± 100                   | 627 ± 349        | 17                           | 208              | 417              | 567              | 808              | 1900         |
| Guatemala           | 164         | 225 ± 236                   | 1089 ± 1840      | 20                           | 312              | 530              | 670              | 1089             | 14740        |
| Jamaica             | 144         | 181 ± 106                   | 738 ± 385        | 36                           | 289              | 536              | 643              | 1012             | 2000         |
| Mexico              | 157         | 210 ± 168                   | 608 ± 325        | 35                           | 247              | 400              | 600              | 718              | 1789         |
| Panama              | 170         | 217 ± 163                   | 752 ± 415        | 40                           | 266              | 560              | 680              | 890              | 2360         |
| Paraguay            | 110         | 209 ± 108                   | 718 ± 347        | 0                            | 373              | 503              | 687              | 833              | 1900         |
| Peru                | 73          | 163 ± 117                   | 686 ± 535        | 3                            | 36               | 360              | 679              | 900              | 3038         |
| Trinidad and Tobago | 177         | 168 ± 90                    | 772 ± 388        | 0                            | 302              | 600              | 1146             | 964              | 2000         |

Supplementary Materials for “Sodium levels in packaged foods sold in 14 Latin American and Caribbean countries”

|                     | n           | Average Sodium (mg/serving) | Average Sodium    | Sodium Percentiles (mg/100g) |                  |                  |                  |                  |              |
|---------------------|-------------|-----------------------------|-------------------|------------------------------|------------------|------------------|------------------|------------------|--------------|
|                     |             |                             | (mg/100g)         | Min                          | 10 <sup>th</sup> | 25 <sup>th</sup> | 50 <sup>th</sup> | 75 <sup>th</sup> | Max          |
| Barbados            | 152         | 177 ± 84                    | 743 ± 335         | 110                          | 321              | 600              | 680              | 900              | 1640         |
|                     |             |                             |                   |                              |                  |                  |                  |                  |              |
| <b>Butter</b>       | <b>507</b>  | <b>87 ± 151</b>             | <b>592 ± 559</b>  | <b>0</b>                     | <b>41</b>        | <b>354</b>       | <b>600</b>       | <b>750</b>       | <b>7636</b>  |
| Argentina           | 23          | 21 ± 23                     | 199 ± 228         | 0                            | 20               | 45               | 120              | 230              | 720          |
| Brazil              | 50          | 71 ± 27                     | 710 ± 267         | 170                          | 396              | 563              | 705              | 853              | 1750         |
| Chile               | 50          | 39 ± 18                     | 545 ± 221         | 9                            | 280              | 415              | 571              | 617              | 1171         |
| Costa Rica          | 43          | 125 ± 302                   | 553 ± 362         | 0                            | 86               | 368              | 600              | 679              | 2000         |
| Cuba                | 1           | 36 ± 0                      | 511 ± 0           | 511                          | 511              | 511              | 511              | 511              | 511          |
| Ecuador             | 32          | 103 ± 186                   | 732 ± 1330        | 0                            | 0                | 27               | 500              | 946              | 7636         |
| Guatemala           | 68          | 84 ± 66                     | 672 ± 681         | 0                            | 14               | 428              | 705              | 785              | 4200         |
| Jamaica             | 30          | 79 ± 42                     | 595 ± 251         | 0                            | 348              | 525              | 625              | 714              | 1000         |
| Mexico              | 46          | 30 ± 72                     | 297 ± 259         | 0                            | 10               | 159              | 200              | 495              | 1020         |
| Panama              | 51          | 84 ± 37                     | 594 ± 258         | 0                            | 0                | 595              | 640              | 750              | 930          |
| Paraguay            | 17          | 48 ± 34                     | 484 ± 339         | 96                           | 132              | 200              | 470              | 670              | 1110         |
| Peru                | 18          | 141 ± 179                   | 1079 ± 1238       | 20                           | 120              | 413              | 786              | 1173             | 5000         |
| Trinidad and Tobago | 28          | 281 ± 366                   | 781 ± 400         | 0                            | 459              | 573              | 714              | 841              | 1733         |
| Barbados            | 50          | 82 ± 53                     | 564 ± 286         | 0                            | 200              | 473              | 620              | 710              | 1790         |
|                     |             |                             |                   |                              |                  |                  |                  |                  |              |
| <b>Snacks</b>       | <b>2235</b> | <b>208 ± 303</b>            | <b>724 ± 1041</b> | <b>0</b>                     | <b>211</b>       | <b>400</b>       | <b>625</b>       | <b>905</b>       | <b>42860</b> |
| Argentina           | 123         | 223 ± 272                   | 863 ± 1043        | 0                            | 174              | 423              | 608              | 900              | 8000         |
| Brazil              | 198         | 196 ± 122                   | 812 ± 484         | 20                           | 347              | 517              | 764              | 1010             | 3516         |
| Chile               | 132         | 117 ± 71                    | 443 ± 271         | 0                            | 12               | 267              | 458              | 623              | 1300         |
| Costa Rica          | 206         | 195 ± 157                   | 765 ± 579         | 0                            | 216              | 395              | 643              | 956              | 5013         |
| Cuba                | 14          | 229 ± 83                    | 622 ± 179         | 330                          | 365              | 544              | 675              | 699              | 1023         |
| Ecuador             | 187         | 185 ± 162                   | 591 ± 483         | 0                            | 117              | 271              | 467              | 786              | 3214         |
| Guatemala           | 181         | 282 ± 880                   | 774 ± 701         | 0                            | 178              | 410              | 689              | 964              | 7000         |



Supplementary Materials for “Sodium levels in packaged foods sold in 14 Latin American and Caribbean countries”

|                     | n           | Average Sodium (mg/serving) | Average Sodium       | Sodium Percentiles (mg/100g) |                  |                  |                  |                  |              |
|---------------------|-------------|-----------------------------|----------------------|------------------------------|------------------|------------------|------------------|------------------|--------------|
|                     |             |                             | (mg/100g)            | Min                          | 10 <sup>th</sup> | 25 <sup>th</sup> | 50 <sup>th</sup> | 75 <sup>th</sup> | Max          |
| Jamaica             | 147         | 210 ± 144                   | 671 ± 436            | 11                           | 217              | 384              | 607              | 913              | 3393         |
| Mexico              | 211         | 269 ± 267                   | 812 ± 518            | 0                            | 324              | 500              | 714              | 975              | 3166         |
| Panama              | 207         | 214 ± 151                   | 735 ± 464            | 0                            | 262              | 410              | 670              | 1000             | 3230         |
| Paraguay            | 159         | 184 ± 113                   | 670 ± 425            | 0                            | 34               | 400              | 610              | 944              | 2333         |
| Peru                | 116         | 162 ± 117                   | 584 ± 399            | 0                            | 182              | 377              | 537              | 700              | 3000         |
| Trinidad and Tobago | 152         | 213 ± 135                   | 676 ± 357            | 0                            | 250              | 428              | 635              | 933              | 1710         |
| Barbados            | 202         | 211 ± 228                   | 907 ± 2997           | 0                            | 252              | 430              | 635              | 910              | 42860        |
|                     |             |                             |                      |                              |                  |                  |                  |                  |              |
| <b>Pasta</b>        | <b>849</b>  | <b>433 ± 500</b>            | <b>493 ± 630</b>     | <b>0</b>                     | <b>0</b>         | <b>10</b>        | <b>284</b>       | <b>830</b>       | <b>7000</b>  |
| Argentina           | 96          | 264 ± 360                   | 296 ± 412            | 0                            | 6                | 10               | 14               | 682              | 1572         |
| Brazil              | 51          | 1309 ± 262                  | 1531 ± 344           | 244                          | 1070             | 1363             | 1651             | 1765             | 1942         |
| Chile               | 57          | 155 ± 309                   | 236 ± 474            | 2                            | 2                | 2                | 10               | 25               | 1742         |
| Costa Rica          | 48          | 597 ± 596                   | 840 ± 640            | 0                            | 0                | 469              | 810              | 1045             | 2800         |
| Cuba                | 30          | 4 ± 3                       | 4 ± 4                | 0                            | 2                | 2                | 2                | 5                | 20           |
| Ecuador             | 50          | 326 ± 610                   | 403 ± 658            | 0                            | 2                | 14               | 265              | 532              | 3295         |
| Guatemala           | 66          | 132 ± 297                   | 169 ± 354            | 0                            | 0                | 0                | 12               | 125              | 1400         |
| Jamaica             | 31          | 608 ± 219                   | 724 ± 382            | 234                          | 300              | 308              | 777              | 950              | 1861         |
| Mexico              | 46          | 696 ± 346                   | 669 ± 401            | 25                           | 273              | 332              | 505              | 929              | 1500         |
| Panama              | 64          | 533 ± 734                   | 357 ± 694            | 0                            | 0                | 0                | 220              | 350              | 3700         |
| Paraguay            | 120         | 497 ± 422                   | 545 ± 513            | 0                            | 513              | 513              | 513              | 513              | 2035         |
| Peru                | 73          | 96 ± 465                    | 218 ± 843            | 0                            | 0                | 0                | 5                | 129              | 7000         |
| Trinidad and Tobago | 60          | 279 ± 320                   | 250 ± 407            | 0                            | 0                | 0                | 10               | 323              | 2140         |
| Barbados            | 57          | 656 ± 182                   | 954 ± 431            | 0                            | 346              | 830              | 1000             | 1070             | 2230         |
| <b>Condiments</b>   | <b>1083</b> | <b>716 ± 2230</b>           | <b>11271 ± 10448</b> | <b>0</b>                     | <b>220</b>       | <b>1300</b>      | <b>8889</b>      | <b>19576</b>     | <b>40000</b> |

Supplementary Materials for “Sodium levels in packaged foods sold in 14 Latin American and Caribbean countries”

|                     | n   | Average Sodium (mg/serving) | Average Sodium | Sodium Percentiles (mg/100g) |                  |                  |                  |                  |       |
|---------------------|-----|-----------------------------|----------------|------------------------------|------------------|------------------|------------------|------------------|-------|
|                     |     |                             | (mg/100g)      | Min                          | 10 <sup>th</sup> | 25 <sup>th</sup> | 50 <sup>th</sup> | 75 <sup>th</sup> | Max   |
| Argentina           | 71  | 555 ± 372                   | 12977 ± 9391   | 0                            | 900              | 2670             | 13410            | 19831            | 33810 |
| Brazil              | 107 | 961 ± 403                   | 20184 ± 8218   | 1852                         | 8616             | 15797            | 18700            | 26256            | 38000 |
| Chile               | 85  | 389 ± 320                   | 9220 ± 8041    | 9                            | 577              | 2317             | 8602             | 12313            | 33100 |
| Costa Rica          | 85  | 512 ± 415                   | 12213 ± 9936   | 0                            | 7                | 3389             | 10000            | 19800            | 33000 |
| Cuba                | 23  | 521 ± 580                   | 4528 ± 7502    | 0                            | 123              | 227              | 434              | 6620             | 24000 |
| Ecuador             | 76  | 247 ± 305                   | 5542 ± 8397    | 0                            | 0                | 188              | 1460             | 6060             | 39300 |
| Guatemala           | 50  | 459 ± 277                   | 6179 ± 7525    | 0                            | 400              | 818              | 2200             | 9200             | 25500 |
| Jamaica             | 66  | 242 ± 158                   | 12068 ± 9245   | 0                            | 2188             | 5314             | 8889             | 17725            | 36000 |
| Mexico              | 124 | 1229 ± 2911                 | 13645 ± 9553   | 0                            | 730              | 5675             | 13803            | 20632            | 38000 |
| Panama              | 79  | 1029 ± 3450                 | 3630 ± 5187    | 0                            | 416              | 645              | 920              | 5415             | 25400 |
| Paraguay            | 40  | 842 ± 591                   | 20509 ± 9173   | 5600                         | 8976             | 15350            | 19600            | 20995            | 38000 |
| Peru                | 86  | 456 ± 637                   | 9302 ± 10747   | 0                            | 20               | 766              | 3311             | 20288            | 32670 |
| Trinidad and Tobago | 77  | 1256 ± 5795                 | 9895 ± 13647   | 0                            | 16               | 31               | 2600             | 14286            | 40000 |
| Barbados            | 114 | 417 ± 325                   | 6710 ± 8785    | 0                            | 493              | 933              | 2945             | 8668             | 51670 |

Data presented as mean ± standard deviation.

**Table S3. Detailed assessment sodium levels in packaged foods by Country**

|                      | n           | Average Sodium (mg/serving) | Average Sodium (mg/100g) | Sodium Percentiles (mg/100g) |                  |                  |                  |                  |       |
|----------------------|-------------|-----------------------------|--------------------------|------------------------------|------------------|------------------|------------------|------------------|-------|
|                      |             |                             |                          | Min                          | 10 <sup>th</sup> | 25 <sup>th</sup> | 50 <sup>th</sup> | 75 <sup>th</sup> | Max   |
| <b>Argentina</b>     | <b>1275</b> |                             |                          |                              |                  |                  |                  |                  |       |
| Soup                 | 79          | 204 ± 341                   | 884 ± 1417               | 2                            | 25               | 247              | 327              | 964              | 5900  |
| Meat                 | 212         | 468 ± 271                   | 979 ± 559                | 30                           | 457              | 700              | 850              | 1088             | 3500  |
| Bread                | 123         | 208 ± 146                   | 452 ± 255                | 0                            | 81               | 279              | 480              | 609              | 1200  |
| Mayonnaise           | 18          | 107 ± 26                    | 856 ± 145                | 558                          | 622              | 786              | 903              | 948              | 1067  |
| Cookies and Biscuits | 165         | 116 ± 113                   | 377 ± 374                | 0                            | 75               | 133              | 288              | 553              | 3433  |
| Cakes                | 127         | 146 ± 91                    | 323 ± 204                | 3                            | 81               | 214              | 260              | 435              | 820   |
| Breakfast Cereals    | 88          | 95 ± 76                     | 318 ± 253                | 0                            | 46               | 113              | 277              | 518              | 1100  |
| Cheese               | 150         | 194 ± 108                   | 679 ± 731                | 27                           | 236              | 467              | 583              | 803              | 8800  |
| Butter               | 23          | 21 ± 23                     | 199 ± 228                | 0                            | 20               | 45               | 120              | 230              | 720   |
| Snacks               | 123         | 223 ± 272                   | 863 ± 1043               | 0                            | 174              | 423              | 608              | 900              | 8000  |
| Pasta                | 96          | 264 ± 360                   | 296 ± 412                | 0                            | 6                | 10               | 14               | 682              | 1572  |
| Condiments           | 71          | 555 ± 372                   | 12977 ± 9391             | 0                            | 900              | 2670             | 13410            | 19831            | 33810 |
|                      |             |                             |                          |                              |                  |                  |                  |                  |       |
| <b>Brazil</b>        | <b>1382</b> |                             |                          |                              |                  |                  |                  |                  |       |
| Soup                 | 80          | 110 ± 86                    | 310 ± 203                | 1                            | 71               | 119              | 309              | 421              | 794   |
| Meat                 | 200         | 575 ± 240                   | 1044 ± 388               | 274                          | 617              | 812              | 1035             | 1226             | 3070  |
| Bread                | 101         | 198 ± 51                    | 417 ± 128                | 168                          | 270              | 326              | 414              | 484              | 847   |
| Mayonnaise           | 33          | 107 ± 24                    | 881 ± 208                | 375                          | 545              | 792              | 975              | 1025             | 1100  |
| Cookies and Biscuits | 150         | 108 ± 72                    | 356 ± 227                | 63                           | 173              | 208              | 294              | 417              | 1443  |
| Cakes                | 154         | 133 ± 53                    | 324 ± 153                | 55                           | 144              | 200              | 315              | 443              | 860   |
| Breakfast Cereals    | 100         | 73 ± 66                     | 224 ± 217                | 0                            | 18               | 76               | 166              | 327              | 1500  |

Supplementary Materials for “Sodium levels in packaged foods sold in 14 Latin American and Caribbean countries”

|                      | n           | Average Sodium (mg/serving) | Average Sodium (mg/100g) | Sodium Percentiles (mg/100g) |                  |                  |                  |                  |       |
|----------------------|-------------|-----------------------------|--------------------------|------------------------------|------------------|------------------|------------------|------------------|-------|
|                      |             |                             |                          | Min                          | 10 <sup>th</sup> | 25 <sup>th</sup> | 50 <sup>th</sup> | 75 <sup>th</sup> | Max   |
| Cheese               | 158         | 200 ± 116                   | 664 ± 400                | 50                           | 327              | 400              | 562              | 830              | 3000  |
| Butter               | 50          | 71 ± 27                     | 710 ± 267                | 170                          | 396              | 563              | 705              | 853              | 1750  |
| Snacks               | 198         | 196 ± 122                   | 812 ± 484                | 20                           | 347              | 517              | 764              | 1010             | 3516  |
| Pasta                | 51          | 1309 ± 262                  | 1531 ± 344               | 244                          | 1070             | 1363             | 1651             | 1765             | 1942  |
| Condiments           | 107         | 961 ± 403                   | 20184 ± 8218             | 1852                         | 8616             | 15797            | 18700            | 26256            | 38000 |
|                      |             |                             |                          |                              |                  |                  |                  |                  |       |
| <b>Chile</b>         | <b>1328</b> |                             |                          |                              |                  |                  |                  |                  |       |
| Soup                 | 81          | 101 ± 85                    | 244 ± 125                | 35                           | 71               | 154              | 205              | 366              | 439   |
| Meat                 | 219         | 409 ± 255                   | 995 ± 435                | 70                           | 475              | 759              | 929              | 1144             | 2630  |
| Bread                | 106         | 227 ± 89                    | 428 ± 140                | 7                            | 272              | 365              | 413              | 491              | 984   |
| Mayonnaise           | 30          | 96 ± 25                     | 759 ± 187                | 400                          | 547              | 627              | 769              | 921              | 1031  |
| Cookies and Biscuits | 152         | 80 ± 63                     | 265 ± 198                | 6                            | 95               | 130              | 228              | 331              | 1367  |
| Cakes                | 157         | 149 ± 110                   | 231 ± 180                | 21                           | 73               | 113              | 183              | 313              | 1460  |
| Breakfast Cereals    | 109         | 69 ± 57                     | 213 ± 175                | 1                            | 7                | 50               | 188              | 324              | 642   |
| Cheese               | 150         | 144 ± 82                    | 603 ± 396                | 42                           | 261              | 340              | 482              | 795              | 2230  |
| Butter               | 50          | 39 ± 18                     | 545 ± 221                | 9                            | 280              | 415              | 571              | 617              | 1171  |
| Snacks               | 132         | 117 ± 71                    | 443 ± 271                | 0                            | 12               | 267              | 458              | 623              | 1300  |
| Pasta                | 57          | 155 ± 309                   | 236 ± 474                | 2                            | 2                | 2                | 10               | 25               | 1742  |
| Condiments           | 85          | 389 ± 320                   | 9220 ± 8041              | 9                            | 577              | 2317             | 8602             | 12313            | 33100 |
|                      |             |                             |                          |                              |                  |                  |                  |                  |       |
| <b>Costa Rica</b>    | <b>1224</b> |                             |                          |                              |                  |                  |                  |                  |       |
| Soup                 | 84          | 178 ± 144                   | 417 ± 206                | 17                           | 170              | 276              | 370              | 640              | 737   |
| Meat                 | 101         | 605 ± 567                   | 926 ± 611                | 31                           | 406              | 511              | 827              | 1127             | 4200  |
| Bread                | 83          | 232 ± 251                   | 435 ± 314                | 0                            | 0                | 215              | 473              | 591              | 1240  |
| Mayonnaise           | 34          | 114 ± 26                    | 754 ± 162                | 373                          | 493              | 617              | 833              | 867              | 933   |
| Cookies and Biscuits | 170         | 122 ± 108                   | 437 ± 343                | 0                            | 139              | 215              | 318              | 560              | 1929  |

Supplementary Materials for “Sodium levels in packaged foods sold in 14 Latin American and Caribbean countries”

|                      | n           | Average Sodium (mg/serving) | Average Sodium (mg/100g) | Sodium Percentiles (mg/100g) |                  |                  |                  |                  |       |
|----------------------|-------------|-----------------------------|--------------------------|------------------------------|------------------|------------------|------------------|------------------|-------|
|                      |             |                             |                          | Min                          | 10 <sup>th</sup> | 25 <sup>th</sup> | 50 <sup>th</sup> | 75 <sup>th</sup> | Max   |
| Cakes                | 117         | 180 ± 114                   | 385 ± 244                | 22                           | 132              | 195              | 297              | 572              | 971   |
| Breakfast Cereals    | 115         | 140 ± 63                    | 433 ± 185                | 44                           | 240              | 315              | 400              | 550              | 1067  |
| Cheese               | 138         | 282 ± 412                   | 842 ± 845                | 0                            | 300              | 500              | 627              | 960              | 6800  |
| Butter               | 43          | 125 ± 302                   | 553 ± 362                | 0                            | 86               | 368              | 600              | 679              | 2000  |
| Snacks               | 206         | 195 ± 157                   | 765 ± 579                | 0                            | 216              | 395              | 643              | 956              | 5013  |
| Pasta                | 48          | 597 ± 596                   | 840 ± 640                | 0                            | 0                | 469              | 810              | 1045             | 2800  |
| Condiments           | 85          | 512 ± 415                   | 12213 ± 9936             | 0                            | 7                | 3389             | 10000            | 19800            | 33000 |
|                      |             |                             |                          |                              |                  |                  |                  |                  |       |
| <b>Cuba</b>          | <b>241</b>  |                             |                          |                              |                  |                  |                  |                  |       |
| Soup                 | 17          | 35 ± 36                     | 150 ± 139                | 15                           | 30               | 86               | 94               | 124              | 460   |
| Meat                 | 34          | 1086 ± 837                  | 773 ± 478                | 95                           | 116              | 428              | 780              | 908              | 1960  |
| Bread                | 24          | 312 ± 137                   | 542 ± 76                 | 381                          | 473              | 479              | 528              | 601              | 696   |
| Mayonnaise           | 6           | 80 ± 33                     | 525 ± 140                | 354                          | 374              | 413              | 531              | 633              | 696   |
| Cookies and Biscuits | 29          | 42 ± 41                     | 230 ± 173                | 16                           | 43               | 43               | 197              | 306              | 700   |
| Cakes                | 8           | 65 ± 31                     | 225 ± 84                 | 75                           | 132              | 198              | 214              | 303              | 320   |
| Breakfast Cereals    | 23          | 175 ± 178                   | 602 ± 708                | 0                            | 150              | 297              | 450              | 568              | 2760  |
| Cheese               | 32          | 162 ± 14                    | 838 ± 439                | 39                           | 339              | 405              | 900              | 1122             | 1930  |
| Butter               | 1           | 36 ± 0                      | 511 ± 0                  | 511                          | 511              | 511              | 511              | 511              | 511   |
| Snacks               | 14          | 229 ± 83                    | 622 ± 179                | 330                          | 365              | 544              | 675              | 699              | 1023  |
| Pasta                | 30          | 4 ± 3                       | 4 ± 4                    | 0                            | 2                | 2                | 2                | 5                | 20    |
| Condiments           | 23          | 521 ± 580                   | 5709 ± 8323              | 0                            | 140              | 249              | 511              | 10015            | 24000 |
|                      |             |                             |                          |                              |                  |                  |                  |                  |       |
| <b>Ecuador</b>       | <b>1313</b> |                             |                          |                              |                  |                  |                  |                  |       |
| Soup                 | 60          | 184 ± 169                   | 548 ± 260                | 3                            | 274              | 387              | 533              | 760              | 1368  |
| Meat                 | 221         | 468 ± 288                   | 992 ± 584                | 55                           | 564              | 745              | 982              | 1120             | 6600  |
| Bread                | 106         | 192 ± 136                   | 421 ± 200                | 0                            | 123              | 329              | 427              | 520              | 1023  |

Supplementary Materials for “Sodium levels in packaged foods sold in 14 Latin American and Caribbean countries”

|                      | n           | Average Sodium (mg/serving) | Average Sodium (mg/100g) | Sodium Percentiles (mg/100g) |                  |                  |                  |                  |       |
|----------------------|-------------|-----------------------------|--------------------------|------------------------------|------------------|------------------|------------------|------------------|-------|
|                      |             |                             |                          | Min                          | 10 <sup>th</sup> | 25 <sup>th</sup> | 50 <sup>th</sup> | 75 <sup>th</sup> | Max   |
| Mayonnaise           | 26          | 106 ± 142                   | 559 ± 206                | 11                           | 393              | 438              | 539              | 643              | 1133  |
| Cookies and Biscuits | 184         | 87 ± 78                     | 309 ± 256                | 0                            | 33               | 120              | 250              | 437              | 1250  |
| Cakes                | 135         | 192 ± 230                   | 331 ± 333                | 0                            | 50               | 148              | 258              | 430              | 2743  |
| Breakfast Cereals    | 100         | 84 ± 149                    | 283 ± 498                | 0                            | 0                | 19               | 200              | 384              | 3400  |
| Cheese               | 136         | 178 ± 100                   | 627 ± 349                | 17                           | 208              | 417              | 567              | 808              | 1900  |
| Butter               | 32          | 103 ± 186                   | 732 ± 1330               | 0                            | 0                | 27               | 500              | 946              | 7636  |
| Snacks               | 187         | 185 ± 162                   | 591 ± 483                | 0                            | 117              | 271              | 467              | 786              | 3214  |
| Pasta                | 50          | 326 ± 610                   | 403 ± 658                | 0                            | 2                | 14               | 265              | 532              | 3295  |
| Condiments           | 76          | 247 ± 305                   | 5542 ± 8397              | 0                            | 0                | 188              | 1460             | 6060             | 39300 |
|                      |             |                             |                          |                              |                  |                  |                  |                  |       |
| <b>Guatemala</b>     | <b>1108</b> |                             |                          |                              |                  |                  |                  |                  |       |
| Soup                 | 79          | 240 ± 195                   | 422 ± 157                | 90                           | 264              | 314              | 370              | 538              | 754   |
| Meat                 | 60          | 739 ± 1519                  | 1067 ± 1003              | 0                            | 1                | 700              | 940              | 1214             | 4500  |
| Bread                | 68          | 201 ± 159                   | 519 ± 702                | 0                            | 38               | 281              | 457              | 540              | 4444  |
| Mayonnaise           | 29          | 101 ± 37                    | 702 ± 272                | 36                           | 469              | 533              | 733              | 867              | 1250  |
| Cookies and Biscuits | 147         | 123 ± 129                   | 457 ± 421                | 0                            | 100              | 188              | 336              | 611              | 2400  |
| Cakes                | 96          | 212 ± 115                   | 470 ± 273                | 22                           | 165              | 253              | 402              | 701              | 1483  |
| Breakfast Cereals    | 100         | 133 ± 56                    | 412 ± 188                | 0                            | 183              | 300              | 433              | 533              | 800   |
| Cheese               | 164         | 225 ± 236                   | 1089 ± 1840              | 20                           | 312              | 530              | 670              | 1089             | 14740 |
| Butter               | 68          | 84 ± 66                     | 672 ± 681                | 0                            | 14               | 428              | 705              | 785              | 4200  |
| Snacks               | 181         | 282 ± 880                   | 774 ± 701                | 0                            | 178              | 410              | 689              | 964              | 7000  |
| Pasta                | 66          | 132 ± 297                   | 169 ± 354                | 0                            | 0                | 0                | 12               | 125              | 1400  |
| Condiments           | 50          | 459 ± 277                   | 6179 ± 7525              | 0                            | 400              | 818              | 2200             | 9200             | 25500 |
|                      |             |                             |                          |                              |                  |                  |                  |                  |       |
| <b>Jamaica</b>       | <b>1051</b> |                             |                          |                              |                  |                  |                  |                  |       |
| Soup                 | 90          | 190 ± 122                   | 420 ± 407                | 0                            | 181              | 251              | 329              | 421              | 3467  |

Supplementary Materials for “Sodium levels in packaged foods sold in 14 Latin American and Caribbean countries”

|                      | n           | Average Sodium (mg/serving) | Average Sodium (mg/100g) | Sodium Percentiles (mg/100g) |                  |                  |                  |                  |       |
|----------------------|-------------|-----------------------------|--------------------------|------------------------------|------------------|------------------|------------------|------------------|-------|
|                      |             |                             |                          | Min                          | 10 <sup>th</sup> | 25 <sup>th</sup> | 50 <sup>th</sup> | 75 <sup>th</sup> | Max   |
| Meat                 | 100         | 499 ± 250                   | 788 ± 310                | 47                           | 400              | 632              | 810              | 982              | 1760  |
| Bread                | 72          | 257 ± 160                   | 465 ± 137                | 0                            | 298              | 415              | 481              | 516              | 969   |
| Mayonnaise           | 11          | 84 ± 27                     | 571 ± 165                | 333                          | 393              | 393              | 633              | 706              | 767   |
| Cookies and Biscuits | 171         | 142 ± 86                    | 460 ± 241                | 86                           | 197              | 299              | 400              | 606              | 1300  |
| Cakes                | 75          | 302 ± 93                    | 540 ± 224                | 125                          | 267              | 330              | 595              | 721              | 947   |
| Breakfast Cereals    | 114         | 168 ± 93                    | 456 ± 223                | 0                            | 141              | 335              | 457              | 575              | 1179  |
| Cheese               | 144         | 181 ± 106                   | 738 ± 385                | 36                           | 289              | 536              | 643              | 1012             | 2000  |
| Butter               | 30          | 79 ± 42                     | 595 ± 251                | 0                            | 348              | 525              | 625              | 714              | 1000  |
| Snacks               | 147         | 210 ± 144                   | 671 ± 436                | 11                           | 217              | 384              | 607              | 913              | 3393  |
| Pasta                | 31          | 608 ± 219                   | 724 ± 382                | 234                          | 300              | 308              | 777              | 950              | 1861  |
| Condiments           | 66          | 242 ± 158                   | 12068 ± 9245             | 0                            | 2188             | 5314             | 8889             | 17725            | 36000 |
|                      |             |                             |                          |                              |                  |                  |                  |                  |       |
| <b>Mexico</b>        | <b>1424</b> |                             |                          |                              |                  |                  |                  |                  |       |
| Soup                 | 80          | 129 ± 111                   | 268 ± 230                | 12                           | 19               | 35               | 193              | 412              | 796   |
| Meat                 | 214         | 627 ± 464                   | 969 ± 528                | 114                          | 450              | 691              | 900              | 1068             | 4545  |
| Bread                | 112         | 167 ± 122                   | 603 ± 448                | 0                            | 317              | 376              | 475              | 728              | 4000  |
| Mayonnaise           | 37          | 176 ± 182                   | 763 ± 186                | 505                          | 551              | 600              | 733              | 867              | 505   |
| Cookies and Biscuits | 172         | 100 ± 86                    | 357 ± 288                | 0                            | 57               | 165              | 283              | 448              | 1433  |
| Cakes                | 121         | 171 ± 132                   | 369 ± 232                | 0                            | 143              | 238              | 324              | 438              | 1371  |
| Breakfast Cereals    | 104         | 103 ± 65                    | 323 ± 204                | 0                            | 27               | 99               | 356              | 467              | 1073  |
| Cheese               | 157         | 210 ± 168                   | 608 ± 325                | 35                           | 247              | 400              | 600              | 718              | 1789  |
| Butter               | 46          | 30 ± 72                     | 297 ± 259                | 0                            | 10               | 159              | 200              | 495              | 1020  |
| Snacks               | 211         | 269 ± 267                   | 812 ± 518                | 0                            | 324              | 500              | 714              | 975              | 3166  |
| Pasta                | 46          | 696 ± 346                   | 669 ± 401                | 25                           | 273              | 332              | 505              | 929              | 1500  |
| Condiments           | 124         | 1229 ± 2911                 | 13645 ± 9553             | 0                            | 730              | 5675             | 13803            | 20632            | 38000 |
|                      |             |                             |                          |                              |                  |                  |                  |                  |       |

Supplementary Materials for “Sodium levels in packaged foods sold in 14 Latin American and Caribbean countries”

|                      | n           | Average Sodium (mg/serving) | Average Sodium (mg/100g) | Sodium Percentiles (mg/100g) |                  |                  |                  |                  |       |
|----------------------|-------------|-----------------------------|--------------------------|------------------------------|------------------|------------------|------------------|------------------|-------|
|                      |             |                             |                          | Min                          | 10 <sup>th</sup> | 25 <sup>th</sup> | 50 <sup>th</sup> | 75 <sup>th</sup> | Max   |
| <b>Panama</b>        | <b>1509</b> |                             |                          |                              |                  |                  |                  |                  |       |
| Soup                 | 71          | 137 ± 112                   | 341 ± 109                | 54                           | 195              | 293              | 317              | 391              | 607   |
| Meat                 | 187         | 453 ± 233                   | 770 ± 688                | 12                           | 140              | 420              | 720              | 905              | 5730  |
| Bread                | 137         | 178 ± 98                    | 531 ± 221                | 10                           | 320              | 440              | 500              | 610              | 1270  |
| Mayonnaise           | 25          | 105 ± 25                    | 745 ± 213                | 370                          | 490              | 627              | 770              | 870              | 1400  |
| Cookies and Biscuits | 199         | 131 ± 86                    | 479 ± 304                | 0                            | 140              | 235              | 390              | 695              | 1640  |
| Cakes                | 129         | 222 ± 121                   | 405 ± 235                | 0                            | 124              | 270              | 380              | 530              | 1130  |
| Breakfast Cereals    | 190         | 118 ± 69                    | 344 ± 201                | 0                            | 10               | 220              | 355              | 493              | 810   |
| Cheese               | 170         | 217 ± 163                   | 752 ± 415                | 40                           | 266              | 560              | 680              | 890              | 2360  |
| Butter               | 51          | 84 ± 37                     | 594 ± 258                | 0                            | 0                | 595              | 640              | 750              | 930   |
| Snacks               | 207         | 214 ± 151                   | 735 ± 464                | 0                            | 262              | 410              | 670              | 1000             | 3230  |
| Pasta                | 64          | 533 ± 734                   | 357 ± 694                | 0                            | 0                | 0                | 220              | 350              | 3700  |
| Condiments           | 79          | 1029 ± 3450                 | 3630 ± 5187              | 0                            | 416              | 645              | 920              | 5415             | 25400 |
|                      |             |                             |                          |                              |                  |                  |                  |                  |       |
| <b>Paraguay</b>      | <b>981</b>  |                             |                          |                              |                  |                  |                  |                  |       |
| Soup                 | 31          | 95 ± 91                     | 333 ± 143                | 205                          | 230              | 257              | 295              | 306              | 766   |
| Meat                 | 129         | 347 ± 214                   | 793 ± 450                | 0                            | 339              | 542              | 725              | 990              | 3000  |
| Bread                | 76          | 165 ± 78                    | 398 ± 199                | 0                            | 86               | 299              | 439              | 536              | 913   |
| Mayonnaise           | 18          | 109 ± 16                    | 915 ± 120                | 610                          | 741              | 883              | 942              | 988              | 1075  |
| Cookies and Biscuits | 148         | 88 ± 64                     | 319 ± 211                | 0                            | 134              | 199              | 266              | 374              | 1197  |
| Cakes                | 35          | 198 ± 92                    | 472 ± 176                | 120                          | 200              | 368              | 496              | 577              | 765   |
| Breakfast Cereals    | 98          | 60 ± 63                     | 201 ± 210                | 0                            | 12               | 69               | 125              | 269              | 977   |
| Cheese               | 110         | 209 ± 108                   | 718 ± 347                | 0                            | 373              | 503              | 687              | 833              | 1900  |
| Butter               | 17          | 48 ± 34                     | 484 ± 339                | 96                           | 132              | 200              | 470              | 670              | 1110  |
| Snacks               | 159         | 184 ± 113                   | 670 ± 425                | 0                            | 34               | 400              | 610              | 944              | 2333  |



Supplementary Materials for “Sodium levels in packaged foods sold in 14 Latin American and Caribbean countries”

|                            | n           | Average Sodium (mg/serving) | Average Sodium (mg/100g) | Sodium Percentiles (mg/100g) |                  |                  |                  |                  |       |
|----------------------------|-------------|-----------------------------|--------------------------|------------------------------|------------------|------------------|------------------|------------------|-------|
|                            |             |                             |                          | Min                          | 10 <sup>th</sup> | 25 <sup>th</sup> | 50 <sup>th</sup> | 75 <sup>th</sup> | Max   |
| Pasta                      | 120         | 497 ± 422                   | 545 ± 513                | 0                            | 513              | 513              | 513              | 513              | 2035  |
| Condiments                 | 40          | 842 ± 591                   | 20509 ± 9173             | 5600                         | 8976             | 15350            | 19600            | 20995            | 38000 |
|                            |             |                             |                          |                              |                  |                  |                  |                  |       |
| <b>Peru</b>                | <b>850</b>  |                             |                          |                              |                  |                  |                  |                  |       |
| Soup                       | 94          | 164 ± 110                   | 339 ± 114                | 18                           | 245              | 280              | 330              | 382              | 885   |
| Meat                       | 49          | 315 ± 325                   | 748 ± 1129               | 0                            | 0                | 72               | 560              | 959              | 7000  |
| Bread                      | 68          | 286 ± 281                   | 503 ± 249                | 1                            | 222              | 404              | 486              | 590              | 1300  |
| Mayonnaise                 | 20          | 107 ± 58                    | 789 ± 388                | 96                           | 344              | 598              | 733              | 1000             | 2000  |
| Cookies and Biscuits       | 129         | 149 ± 99                    | 432 ± 280                | 0                            | 165              | 239              | 340              | 620              | 1643  |
| Cakes                      | 33          | 172 ± 134                   | 425 ± 301                | 0                            | 104              | 200              | 677              | 104              | 1465  |
| Breakfast Cereals          | 91          | 72 ± 91                     | 251 ± 276                | 0                            | 2                | 7                | 229              | 378              | 1395  |
| Cheese                     | 73          | 163 ± 117                   | 686 ± 535                | 3                            | 36               | 360              | 679              | 900              | 3038  |
| Butter                     | 18          | 141 ± 179                   | 1079 ± 1238              | 20                           | 120              | 413              | 786              | 1173             | 5000  |
| Snacks                     | 116         | 162 ± 117                   | 584 ± 399                | 0                            | 182              | 377              | 537              | 700              | 3000  |
| Pasta                      | 73          | 96 ± 465                    | 218 ± 843                | 0                            | 0                | 0                | 5                | 129              | 7000  |
| Condiments                 | 86          | 456 ± 637                   | 9302 ± 10747             | 0                            | 20               | 766              | 3311             | 20288            | 32670 |
|                            |             |                             |                          |                              |                  |                  |                  |                  |       |
| <b>Trinidad and Tobago</b> | <b>1318</b> |                             |                          |                              |                  |                  |                  |                  |       |
| Soup                       | 98          | 203 ± 130                   | 403 ± 176                | 43                           | 189              | 281              | 372              | 527              | 771   |
| Meat                       | 179         | 497 ± 443                   | 868 ± 584                | 54                           | 408              | 447              | 804              | 1035             | 4955  |
| Bread                      | 95          | 226 ± 138                   | 421 ± 171                | 0                            | 202              | 350              | 450              | 510              | 1000  |
| Mayonnaise                 | 20          | 88 ± 43                     | 594 ± 298                | 0                            | 303              | 400              | 647              | 713              | 1400  |
| Cookies and Biscuits       | 193         | 111 ± 109                   | 393 ± 274                | 0                            | 170              | 230              | 340              | 470              | 2270  |
| Cakes                      | 127         | 240 ± 102                   | 433 ± 255                | 80                           | 190              | 260              | 330              | 660              | 1580  |

Supplementary Materials for “Sodium levels in packaged foods sold in 14 Latin American and Caribbean countries”

|                      | n           | Average Sodium (mg/serving) | Average Sodium (mg/100g) | Sodium Percentiles (mg/100g) |                  |                  |                  |                  |       |
|----------------------|-------------|-----------------------------|--------------------------|------------------------------|------------------|------------------|------------------|------------------|-------|
|                      |             |                             |                          | Min                          | 10 <sup>th</sup> | 25 <sup>th</sup> | 50 <sup>th</sup> | 75 <sup>th</sup> | Max   |
| Breakfast Cereals    | 112         | 147 ± 130                   | 406 ± 245                | 0                            | 85               | 265              | 388              | 534              | 1280  |
| Cheese               | 177         | 168 ± 90                    | 772 ± 388                | 0                            | 302              | 600              | 1146             | 964              | 2000  |
| Butter               | 28          | 281 ± 366                   | 781 ± 400                | 0                            | 459              | 573              | 714              | 841              | 1733  |
| Snacks               | 152         | 213 ± 135                   | 676 ± 357                | 0                            | 250              | 428              | 635              | 933              | 1710  |
| Pasta                | 60          | 279 ± 320                   | 250 ± 407                | 0                            | 0                | 0                | 10               | 323              | 2140  |
| Condiments           | 77          | 1256 ± 5795                 | 9895 ± 13647             | 0                            | 16               | 31               | 2600             | 14286            | 40000 |
|                      |             |                             |                          |                              |                  |                  |                  |                  |       |
| <b>Barbados</b>      | <b>1353</b> |                             |                          |                              |                  |                  |                  |                  |       |
| Soup                 | 80          | 162 ± 128                   | 355 ± 204                | 13                           | 165              | 238              | 285              | 429              | 1053  |
| Meat                 | 166         | 428 ± 157                   | 961 ± 429                | 0                            | 560              | 713              | 855              | 1110             | 2320  |
| Bread                | 100         | 211 ± 106                   | 403 ± 134                | 0                            | 227              | 343              | 410              | 461              | 740   |
| Mayonnaise           | 30          | 105 ± 30                    | 826 ± 626                | 500                          | 518              | 600              | 670              | 800              | 4000  |
| Cookies and Biscuits | 160         | 130 ± 82                    | 451 ± 270                | 10                           | 178              | 278              | 380              | 603              | 1670  |
| Cakes                | 129         | 235 ± 96                    | 505 ± 258                | 40                           | 200              | 300              | 420              | 720              | 1250  |
| Breakfast Cereals    | 113         | 122 ± 97                    | 356 ± 316                | 0                            | 10               | 70               | 370              | 510              | 1680  |
| Cheese               | 152         | 177 ± 84                    | 743 ± 335                | 110                          | 321              | 600              | 680              | 900              | 1640  |
| Butter               | 50          | 82 ± 53                     | 564 ± 286                | 0                            | 200              | 473              | 620              | 710              | 1790  |
| Snacks               | 202         | 211 ± 228                   | 907 ± 2997               | 0                            | 252              | 430              | 635              | 910              | 42860 |
| Pasta                | 57          | 656 ± 182                   | 954 ± 431                | 0                            | 346              | 830              | 1000             | 1070             | 2230  |
| Condiments           | 114         | 417 ± 325                   | 6710 ± 8785              | 0                            | 493              | 933              | 2945             | 8668             | 51670 |

Data presented as mean ± standard deviation.

**Table S4. Detailed assessment of the proportion of foods meeting the Regional Sodium Reduction Targets by Food Category**

|                                     | n          | Regional Target (mg Na/100 g) | % Meeting Regional Target | % Exceeding Regional Target | Lower Target (mg Na/100 g) | % Meeting Lower Target |
|-------------------------------------|------------|-------------------------------|---------------------------|-----------------------------|----------------------------|------------------------|
| <b>Wet and Dry Soups</b>            | <b>817</b> |                               | <b>485 (59%)</b>          | <b>332 (41%)</b>            |                            | <b>353 (43%)</b>       |
| Argentina                           | 79         | <b>360</b>                    | 51 (65%)                  | 28 (35%)                    | <b>306</b>                 | 30 (38%)               |
| Brazil                              | 73         | <b>360</b>                    | 49 (67%)                  | 24 (33%)                    | <b>306</b>                 | 38 (52%)               |
| Chile                               | 69         | <b>360</b>                    | 47 (68%)                  | 22 (32%)                    | <b>306</b>                 | 44 (64%)               |
| Costa Rica                          | 71         | <b>360</b>                    | 34 (48%)                  | 37 (52%)                    | <b>306</b>                 | 23 (32%)               |
| Cuba                                | 16         | <b>360</b>                    | 13 (81%)                  | 3 (19%)                     | <b>306</b>                 | 12 (75%)               |
| Ecuador                             | 56         | <b>360</b>                    | 10 (18%)                  | 46 (82%)                    | <b>306</b>                 | 8 (14%)                |
| Guatemala                           | 49         | <b>360</b>                    | 26 (53%)                  | 23 (47%)                    | <b>306</b>                 | 12 (24%)               |
| Jamaica                             | 58         | <b>360</b>                    | 33 (57%)                  | 25 (43%)                    | <b>306</b>                 | 26 (45%)               |
| Mexico                              | 80         | <b>360</b>                    | 54 (68%)                  | 26 (32%)                    | <b>306</b>                 | 42 (53%)               |
| Panama                              | 44         | <b>360</b>                    | 28 (64%)                  | 16 (36%)                    | <b>306</b>                 | 16 (36%)               |
| Paraguay                            | 28         | <b>360</b>                    | 22 (79%)                  | 6 (21%)                     | <b>306</b>                 | 19 (68%)               |
| Peru                                | 39         | <b>360</b>                    | 29 (74%)                  | 10 (26%)                    | <b>306</b>                 | 15 (38%)               |
| Trinidad and Tobago                 | 75         | <b>360</b>                    | 35 (47%)                  | 40 (53%)                    | <b>306</b>                 | 24 (32%)               |
| Barbados                            | 80         | <b>360</b>                    | 54 (68%)                  | 26 (33%)                    | <b>306</b>                 | 44 (55%)               |
|                                     |            |                               |                           |                             |                            |                        |
| <b>Noodles in Broth-as consumed</b> | <b>207</b> |                               | <b>169 (82%)</b>          | <b>38 (18%)</b>             |                            | <b>114 (55%)</b>       |
| Argentina                           | 0          | <b>430</b>                    | 0 (0%)                    | 0 (0%)                      | <b>360</b>                 | 0 (0%)                 |
| Brazil                              | 7          | <b>430</b>                    | 7 (100%)                  | 0 (0%)                      | <b>360</b>                 | 4 (57%)                |
| Chile                               | 12         | <b>430</b>                    | 12 (100%)                 | 0 (0%)                      | <b>360</b>                 | 11 (92%)               |
| Costa Rica                          | 13         | <b>430</b>                    | 8 (62%)                   | 5 (38%)                     | <b>360</b>                 | 5 (38%)                |
| Cuba                                | 1          | <b>430</b>                    | 1 (100%)                  | 0 (0%)                      | <b>360</b>                 | 1 (100%)               |
| Ecuador                             | 4          | <b>430</b>                    | 1 (25%)                   | 3 (75%)                     | <b>360</b>                 | 1(25%)                 |
| Guatemala                           | 30         | <b>430</b>                    | 15 (50%)                  | 15 (50%)                    | <b>360</b>                 | 8 (27%)                |
| Jamaica                             | 32         | <b>430</b>                    | 32 (100%)                 | 0 (100%)                    | <b>360</b>                 | 21 (70%)               |
| Mexico                              | 0          | <b>430</b>                    | 0 (0%)                    | 0 (0%)                      | <b>360</b>                 | 0 (0%)                 |

Supplementary Materials for “Sodium levels in packaged foods sold in 14 Latin American and Caribbean countries”

|                                                                | n           | Regional Target (mg Na/100 g) | % Meeting Regional Target | % Exceeding Regional Target | Lower Target (mg Na/100 g) | % Meeting Lower Target |
|----------------------------------------------------------------|-------------|-------------------------------|---------------------------|-----------------------------|----------------------------|------------------------|
| Panama                                                         | 27          | <b>430</b>                    | 24 (89%)                  | 3 (11%)                     | <b>360</b>                 | 20 (74%)               |
| Paraguay                                                       | 3           | <b>430</b>                    | 3 (100%)                  | 0 (0%)                      | <b>360</b>                 | 3 (100%)               |
| Peru                                                           | 55          | <b>430</b>                    | 50 (91%)                  | 5 (9%)                      | <b>360</b>                 | 30 (55%)               |
| Trinidad and Tobago                                            | 23          | <b>430</b>                    | 16 (70%)                  | 7 (30%)                     | <b>360</b>                 | 10 (43%)               |
| Barbados                                                       | 0           | <b>430</b>                    | 0 (0%)                    | 0 (0%)                      | <b>360</b>                 | 0 (0%)                 |
|                                                                |             |                               |                           |                             |                            |                        |
| <b>Meats and Cooked, raw and processed Sausages</b>            | <b>1535</b> |                               | <b>1329 (87%)</b>         | <b>206 (13%)</b>            |                            | <b>378 (25%)</b>       |
| Argentina                                                      | 162         | <b>1210</b>                   | 143 (88%)                 | 19 (12%)                    | <b>690</b>                 | 20 (12%)               |
| Brazil                                                         | 162         | <b>1210</b>                   | 120 (74%)                 | 42 (26%)                    | <b>690</b>                 | 20 (12%)               |
| Chile                                                          | 164         | <b>1210</b>                   | 146 (89%)                 | 18 (11%)                    | <b>690</b>                 | 25 (15%)               |
| Costa Rica                                                     | 60          | <b>1210</b>                   | 42 (70%)                  | 18 (30%)                    | <b>690</b>                 | 19 (32%)               |
| Cuba                                                           | 26          | <b>1210</b>                   | 22 (85%)                  | 4 (15%)                     | <b>690</b>                 | 10 (38%)               |
| Ecuador                                                        | 193         | <b>1210</b>                   | 167 (87%)                 | 26 (13%)                    | <b>690</b>                 | 31 (16%)               |
| Guatemala                                                      | 38          | <b>1210</b>                   | 31 (82%)                  | 7 (18%)                     | <b>690</b>                 | 6 (16%)                |
| Jamaica                                                        | 68          | <b>1210</b>                   | 60 (88%)                  | 8 (12%)                     | <b>690</b>                 | 21 (31%)               |
| Mexico                                                         | 148         | <b>1210</b>                   | 138 (93%)                 | 10 (7%)                     | <b>690</b>                 | 38 (26%)               |
| Panama                                                         | 174         | <b>1210</b>                   | 155 (89%)                 | 19 (11%)                    | <b>690</b>                 | 74 (43%)               |
| Paraguay                                                       | 109         | <b>1210</b>                   | 101 (93%)                 | 8 (7%)                      | <b>690</b>                 | 50 (46%)               |
| Peru                                                           | 47          | <b>1210</b>                   | 42 (89%)                  | 5 (11%)                     | <b>690</b>                 | 27 (57%)               |
| Trinidad and Tobago                                            | 45          | <b>1210</b>                   | 44 (98%)                  | 1 (2%)                      | <b>690</b>                 | 15 (33%)               |
| Barbados                                                       | 139         | <b>1210</b>                   | 118 (85%)                 | 21 (15%)                    | <b>690</b>                 | 22 (16%)               |
|                                                                |             |                               |                           |                             |                            |                        |
| <b>Cured dry meats and meats preserved at room temperature</b> | <b>320</b>  |                               | <b>290 (91%)</b>          | <b>30 (9%)</b>              |                            | <b>213 (67%)</b>       |
| Argentina                                                      | 28          | <b>1900</b>                   | 20 (72%)                  | 8 (28%)                     | <b>1350</b>                | 10 (36%)               |
| Brazil                                                         | 13          | <b>1900</b>                   | 10 (77%)                  | 3 (23%)                     | <b>1350</b>                | 4 (31%)                |

Supplementary Materials for “Sodium levels in packaged foods sold in 14 Latin American and Caribbean countries”

|                                 | n          | Regional Target (mg Na/100 g) | % Meeting Regional Target | % Exceeding Regional Target | Lower Target (mg Na/100 g) | % Meeting Lower Target |
|---------------------------------|------------|-------------------------------|---------------------------|-----------------------------|----------------------------|------------------------|
| Chile                           | 37         | <b>1900</b>                   | 34 (92%)                  | 3 (8%)                      | <b>1350</b>                | 10 (27%)               |
| Costa Rica                      | 0          | <b>1900</b>                   | 0 (0%)                    | 0 (0%)                      | <b>1350</b>                | 0 (0%)                 |
| Cuba                            | 4          | <b>1900</b>                   | 3 (75%)                   | 1 (25%)                     | <b>1350</b>                | 2 (50%)                |
| Ecuador                         | 11         | <b>1900</b>                   | 9 (82%)                   | 2 (18%)                     | <b>1350</b>                | 6 (55%)                |
| Guatemala                       | 16         | <b>1900</b>                   | 14 (88%)                  | 2 (13%)                     | <b>1350</b>                | 13 (81%)               |
| Jamaica                         | 31         | <b>1900</b>                   | 31 (100%)                 | 0 (0%)                      | <b>1350</b>                | 30 (97%)               |
| Mexico                          | 49         | <b>1900</b>                   | 41 (84%)                  | 8 (16%)                     | <b>1350</b>                | 28 (57%)               |
| Panama                          | 0          | <b>1900</b>                   | 0 (0%)                    | 0 (0%)                      | <b>1350</b>                | 0 (0%)                 |
| Paraguay                        | 12         | <b>1900</b>                   | 12 (100%)                 | 0(0%)                       | <b>1350</b>                | 8 (67%)                |
| Peru                            | 1          | <b>1900</b>                   | 1 (100%)                  | 0 (0%)                      | <b>1350</b>                | 1 (100%)               |
| Trinidad and Tobago             | 108        | <b>1900</b>                   | 105 (97%)                 | 3 (3%)                      | <b>1350</b>                | 100 (93)               |
| Barbados                        | 10         | <b>1900</b>                   | 10 (100%)                 | 0 (0%)                      | <b>1350</b>                | 1 (1%)                 |
|                                 |            |                               |                           |                             |                            |                        |
| <b>Breaded meat and poultry</b> | <b>216</b> |                               | <b>141 (65%)</b>          | <b>75 (35%)</b>             |                            | <b>60 (28%)</b>        |
| Argentina                       | 22         | <b>735</b>                    | 22 (100%)                 | 0 (0%)                      | <b>470</b>                 | 6 (27%)                |
| Brazil                          | 25         | <b>735</b>                    | 9 (36%)                   | 16 (64%)                    | <b>470</b>                 | 2 (8%)                 |
| Chile                           | 18         | <b>735</b>                    | 16 (89%)                  | 2 (11%)                     | <b>470</b>                 | 10 (56%)               |
| Costa Rica                      | 41         | <b>735</b>                    | 17 (41%)                  | 24(59%)                     | <b>470</b>                 | 4 (10%)                |
| Cuba                            | 4          | <b>735</b>                    | 4 (100%)                  | 0 (0%)                      | <b>470</b>                 | 4 (100%)               |
| Ecuador                         | 17         | <b>735</b>                    | 10 (59%)                  | 7 (41%)                     | <b>470</b>                 | 3 (18)                 |
| Guatemala                       | 6          | <b>735</b>                    | 1 (17%)                   | 5 (83%)                     | <b>470</b>                 | 0 (0%)                 |
| Jamaica                         | 18         | <b>735</b>                    | 16 (89%)                  | 2 (11%)                     | <b>470</b>                 | 10 (55%)               |
| Mexico                          | 17         | <b>735</b>                    | 13 (76%)                  | 4 (24%)                     | <b>470</b>                 | 8 (47%)                |
| Panama                          | 13         | <b>735</b>                    | 10 (77%)                  | 3 (23%)                     | <b>470</b>                 | 6 (46%)                |
| Paraguay                        | 8          | <b>735</b>                    | 4 (50%)                   | 4 (50%)                     | <b>470</b>                 | 2 (25%)                |
| Peru                            | 1          | <b>735</b>                    | 1 (100%)                  | 0 (0%)                      | <b>470</b>                 | 0 (0%)                 |
| Trinidad and Tobago             | 26         | <b>735</b>                    | 17 (65%)                  | 9 (35%)                     | <b>470</b>                 | 10 (38%)               |
| Barbados                        | 17         | <b>735</b>                    | 16 (94%)                  | 1 (6%)                      | <b>470</b>                 | 4 (24%)                |

Supplementary Materials for “Sodium levels in packaged foods sold in 14 Latin American and Caribbean countries”

|                     | n           | Regional Target (mg Na/100 g) | % Meeting Regional Target | % Exceeding Regional Target | Lower Target (mg Na/100 g) | % Meeting Lower Target |
|---------------------|-------------|-------------------------------|---------------------------|-----------------------------|----------------------------|------------------------|
| <b>Bread</b>        | <b>1271</b> |                               | <b>1053 (83%)</b>         | <b>218 (17%)</b>            |                            | <b>434 (34%)</b>       |
| Argentina           | 123         | <b>600</b>                    | 91 (74%)                  | 32 (26%)                    | <b>400</b>                 | 41 (33%)               |
| Brazil              | 101         | <b>600</b>                    | 93 (93%)                  | 8 (8%)                      | <b>400</b>                 | 47 (47%)               |
| Chile               | 106         | <b>600</b>                    | 99 (93%)                  | 7 (7%)                      | <b>400</b>                 | 48 (45%)               |
| Costa Rica          | 83          | <b>600</b>                    | 62 (75%)                  | 21 (25%)                    | <b>400</b>                 | 30 (36%)               |
| Cuba                | 24          | <b>600</b>                    | 17 (71%)                  | 7 (29%)                     | <b>400</b>                 | 1 (4%)                 |
| Ecuador             | 106         | <b>600</b>                    | 97 (92%)                  | 9 (8%)                      | <b>400</b>                 | 38 (36%)               |
| Guatemala           | 68          | <b>600</b>                    | 57 (84%)                  | 11 (16%)                    | <b>400</b>                 | 28 (41%)               |
| Jamaica             | 72          | <b>600</b>                    | 66 (92%)                  | 6 (8%)                      | <b>400</b>                 | 14 (19%)               |
| Mexico              | 112         | <b>600</b>                    | 76 (69%)                  | 36 (31%)                    | <b>400</b>                 | 37 (33%)               |
| Panama              | 137         | <b>600</b>                    | 99 (72%)                  | 38 (28%)                    | <b>400</b>                 | 31 (23%)               |
| Paraguay            | 76          | <b>600</b>                    | 67 (88%)                  | 9 (12%)                     | <b>400</b>                 | 34 (45%)               |
| Peru                | 68          | <b>600</b>                    | 53 (78%)                  | 15 (22%)                    | <b>400</b>                 | 16 (24%)               |
| Trinidad and Tobago | 95          | <b>600</b>                    | 87 (92%)                  | 8 (8%)                      | <b>400</b>                 | 36 (38%)               |
| Barbados            | 100         | <b>600</b>                    | 89 (89%)                  | 11 (11%)                    | <b>400</b>                 | 33 (33%)               |
|                     |             |                               |                           |                             |                            |                        |
| <b>Mayonnaise</b>   | <b>337</b>  |                               | <b>317 (94%)</b>          | <b>20 (6%)</b>              |                            | <b>128 (38%)</b>       |
| Argentina           | 18          | <b>1050</b>                   | 17 (95%)                  | 1 (6%)                      | <b>670</b>                 | 3 (17%)                |
| Brazil              | 33          | <b>1050</b>                   | 29 (88%)                  | 4 (12%)                     | <b>670</b>                 | 5 (15%)                |
| Chile               | 30          | <b>1050</b>                   | 30 (100%)                 | 0 (0%)                      | <b>670</b>                 | 12 (40%)               |
| Costa Rica          | 34          | <b>1050</b>                   | 34 (100%)                 | 0 (0%)                      | <b>670</b>                 | 9 (26%)                |
| Cuba                | 6           | <b>1050</b>                   | 6 (100%)                  | 0 (0%)                      | <b>670</b>                 | 5 (83%)                |
| Ecuador             | 26          | <b>1050</b>                   | 25 (96%)                  | 1 (4%)                      | <b>670</b>                 | 20 (77%)               |
| Guatemala           | 29          | <b>1050</b>                   | 25 (86%)                  | 4 (14%)                     | <b>670</b>                 | 14 (48%)               |
| Jamaica             | 11          | <b>1050</b>                   | 11 (100%)                 | 0 (0%)                      | <b>670</b>                 | 7 (64%)                |
| Mexico              | 37          | <b>1050</b>                   | 35 (95%)                  | 2 (5%)                      | <b>670</b>                 | 14 (38%)               |
| Panama              | 25          | <b>1050</b>                   | 24 (96%)                  | 1 (4%)                      | <b>670</b>                 | 8 (32%)                |

Supplementary Materials for “Sodium levels in packaged foods sold in 14 Latin American and Caribbean countries”

|                                      | n           | Regional Target (mg Na/100 g) | % Meeting Regional Target | % Exceeding Regional Target | Lower Target (mg Na/100 g) | % Meeting Lower Target |
|--------------------------------------|-------------|-------------------------------|---------------------------|-----------------------------|----------------------------|------------------------|
| Paraguay                             | 18          | <b>1050</b>                   | 17 (94%)                  | 1 (6%)                      | <b>670</b>                 | 1 (6%)                 |
| Peru                                 | 20          | <b>1050</b>                   | 18 (90%)                  | 2 (10%)                     | <b>670</b>                 | 8 (40%)                |
| Trinidad and Tobago                  | 20          | <b>1050</b>                   | 19 (95%)                  | 1 (5%)                      | <b>670</b>                 | 12 (60%)               |
| Barbados                             | 30          | <b>1050</b>                   | 27 (90%)                  | 3 (10%)                     | <b>670</b>                 | 10 (33%)               |
|                                      |             |                               |                           |                             |                            |                        |
| <b>Cookies and Sweet Cookies</b>     | <b>1560</b> |                               | <b>1406 (90%)</b>         | <b>154 (10%)</b>            |                            | <b>750 (48%)</b>       |
| Argentina                            | 98          | <b>485</b>                    | 94 (96%)                  | 4 (4%)                      | <b>265</b>                 | 54 (55%)               |
| Brazil                               | 110         | <b>485</b>                    | 110 (100%)                | 0 (0%)                      | <b>265</b>                 | 67 (61%)               |
| Chile                                | 106         | <b>485</b>                    | 106 (100%)                | 0 (0%)                      | <b>265</b>                 | 64 (60%)               |
| Costa Rica                           | 127         | <b>485</b>                    | 118 (93%)                 | 9 (7%)                      | <b>265</b>                 | 62 (49%)               |
| Cuba                                 | 21          | <b>485</b>                    | 21 (100%)                 | 0 (0%)                      | <b>265</b>                 | 13 (62%)               |
| Ecuador                              | 146         | <b>485</b>                    | 133 (91%)                 | 13 (9%)                     | <b>265</b>                 | 97 (66%)               |
| Guatemala                            | 111         | <b>485</b>                    | 94 (85%)                  | 17 (15%)                    | <b>265</b>                 | 55(50%)                |
| Jamaica                              | 115         | <b>485</b>                    | 103 (90%)                 | 12 (10%)                    | <b>265</b>                 | 30 (26%)               |
| Mexico                               | 93          | <b>485</b>                    | 85 (91%)                  | 8 (9%)                      | <b>265</b>                 | 53 (57%)               |
| Panama                               | 128         | <b>485</b>                    | 106 (83%)                 | 22 (17%)                    | <b>265</b>                 | 55 (43%)               |
| Paraguay                             | 116         | <b>485</b>                    | 114 (98%)                 | 2 (2%)                      | <b>265</b>                 | 66 (57%)               |
| Peru                                 | 91          | <b>485</b>                    | 82 (90%)                  | 9 (10%)                     | <b>265</b>                 | 40 (44%)               |
| Trinidad and Tobago                  | 190         | <b>485</b>                    | 145 (76%)                 | 45 (24%)                    | <b>265</b>                 | 57 (30%)               |
| Barbados                             | 108         | <b>485</b>                    | 95 (88%)                  | 13 (12%)                    | <b>265</b>                 | 37 (34%)               |
|                                      |             |                               |                           |                             |                            |                        |
| <b>Flavored Cookies and Crackers</b> | <b>609</b>  |                               | <b>591 (97%)</b>          | <b>18 (3%)</b>              |                            | <b>362 (59%)</b>       |
| Argentina                            | 67          | <b>1340</b>                   | 66 (98%)                  | 1 (2%)                      | <b>700</b>                 | 45 (67%)               |
| Brazil                               | 40          | <b>1340</b>                   | 38 (95%)                  | 2 (5%)                      | <b>700</b>                 | 33 (83%)               |
| Chile                                | 46          | <b>1340</b>                   | 45 (98%)                  | 1 (2%)                      | <b>700</b>                 | 37 (80%)               |
| Costa Rica                           | 43          | <b>1340</b>                   | 38 (88%)                  | 5 (12%)                     | <b>700</b>                 | 14 (33%)               |
| Cuba                                 | 8           | <b>1340</b>                   | 8 (100%)                  | 0 (0%)                      | <b>700</b>                 | 7 (88%)                |

Supplementary Materials for “Sodium levels in packaged foods sold in 14 Latin American and Caribbean countries”

|                          | n           | Regional Target (mg Na/100 g) | % Meeting Regional Target | % Exceeding Regional Target | Lower Target (mg Na/100 g) | % Meeting Lower Target |
|--------------------------|-------------|-------------------------------|---------------------------|-----------------------------|----------------------------|------------------------|
| Ecuador                  | 38          | <b>1340</b>                   | 38 (100%)                 | 0 (0%)                      | <b>700</b>                 | 26 (64%)               |
| Guatemala                | 36          | <b>1340</b>                   | 32 (89%)                  | 4 (11%)                     | <b>700</b>                 | 18 (50%)               |
| Jamaica                  | 56          | <b>1340</b>                   | 56 (100%)                 | 0 (0%)                      | <b>700</b>                 | 27 (48%)               |
| Mexico                   | 79          | <b>1340</b>                   | 77 (97%)                  | 2 (3%)                      | <b>700</b>                 | 58 (73%)               |
| Panama                   | 71          | <b>1340</b>                   | 70 (99%)                  | 1 (1%)                      | <b>700</b>                 | 28 (39%)               |
| Paraguay                 | 32          | <b>1340</b>                   | 32 (100%)                 | 0 (0%)                      | <b>700</b>                 | 21 (66%)               |
| Peru                     | 38          | <b>1340</b>                   | 37 (97%)                  | 1 (3%)                      | <b>700</b>                 | 20 (53%)               |
| Trinidad and Tobago      | 3           | <b>1340</b>                   | 3 (100%)                  | 0 (0%)                      | <b>700</b>                 | 2 (67%)                |
| Barbados                 | 52          | <b>1340</b>                   | 51 (98%)                  | 1 (2%)                      | <b>700</b>                 | 26 (50%)               |
|                          |             |                               |                           |                             |                            |                        |
| <b>Cakes</b>             | <b>1443</b> |                               | <b>919 (64%)</b>          | <b>524 (36%)</b>            |                            | <b>356 (25%)</b>       |
| Argentina                | 127         | <b>400</b>                    | 89 (70%)                  | 38 (30%)                    | <b>205</b>                 | 31 (24%)               |
| Brazil                   | 154         | <b>400</b>                    | 104 (68%)                 | 50 (32%)                    | <b>205</b>                 | 43 (28%)               |
| Chile                    | 157         | <b>400</b>                    | 141 (90%)                 | 16 (10%)                    | <b>205</b>                 | 86 (55%)               |
| Costa Rica               | 117         | <b>400</b>                    | 78 (66%)                  | 39 (33%)                    | <b>205</b>                 | 32 (27%)               |
| Cuba                     | 8           | <b>400</b>                    | 8 (100%)                  | 0 (0%)                      | <b>205</b>                 | 2 (25%)                |
| Ecuador                  | 135         | <b>400</b>                    | 95 (70%)                  | 40 (30%)                    | <b>205</b>                 | 54 (40%)               |
| Guatemala                | 96          | <b>400</b>                    | 48 (50%)                  | 48 (50%)                    | <b>205</b>                 | 18 (19%)               |
| Jamaica                  | 75          | <b>400</b>                    | 27 (36%)                  | 48 (64%)                    | <b>205</b>                 | 4 (5%)                 |
| Mexico                   | 121         | <b>400</b>                    | 84 (69%)                  | 37 (31%)                    | <b>205</b>                 | 22 (18%)               |
| Panama                   | 129         | <b>400</b>                    | 74 (61%)                  | 55 (43%)                    | <b>205</b>                 | 20 (16%)               |
| Paraguay                 | 35          | <b>400</b>                    | 11 (31%)                  | 24 (69%)                    | <b>205</b>                 | 5 (14%)                |
| Peru                     | 33          | <b>400</b>                    | 19 (58%)                  | 14 (42%)                    | <b>205</b>                 | 9 (27%)                |
| Trinidad and Tobago      | 127         | <b>400</b>                    | 79 (62%)                  | 48 (38%)                    | <b>205</b>                 | 15 (12%)               |
| Barbados                 | 129         | <b>400</b>                    | 62 (48%)                  | 67 (52%)                    | <b>205</b>                 | 15 (12%)               |
|                          |             |                               |                           |                             |                            |                        |
| <b>Breakfast Cereals</b> | <b>1457</b> |                               | <b>1326 (91%)</b>         | <b>131 (9%)</b>             |                            | <b>1114 (76%)</b>      |
| Argentina                | 88          | <b>630</b>                    | 76 (87%)                  | 12 (14%)                    | <b>500</b>                 | 63 (72%)               |



Supplementary Materials for “Sodium levels in packaged foods sold in 14 Latin American and Caribbean countries”

|                     | n          | Regional Target (mg Na/100 g) | % Meeting Regional Target | % Exceeding Regional Target | Lower Target (mg Na/100 g) | % Meeting Lower Target |
|---------------------|------------|-------------------------------|---------------------------|-----------------------------|----------------------------|------------------------|
| Brazil              | 100        | <b>630</b>                    | 94 (94%)                  | 6 (6%)                      | <b>500</b>                 | 92 (92%)               |
| Chile               | 109        | <b>630</b>                    | 108 (99%)                 | 1 (1%)                      | <b>500</b>                 | 101 (93%)              |
| Costa Rica          | 115        | <b>630</b>                    | 99 (86%)                  | 16 (14%)                    | <b>500</b>                 | 78 (68%)               |
| Cuba                | 23         | <b>630</b>                    | 19 (83%)                  | 4 (17%)                     | <b>500</b>                 | 14 (61%)               |
| Ecuador             | 100        | <b>630</b>                    | 93 (93%)                  | 7 (7%)                      | <b>500</b>                 | 87 (87%)               |
| Guatemala           | 100        | <b>630</b>                    | 89 (89%)                  | 11 (11%)                    | <b>500</b>                 | 63 (63%)               |
| Jamaica             | 114        | <b>630</b>                    | 94 (82%)                  | 20 (18%)                    | <b>500</b>                 | 72 (63%)               |
| Mexico              | 104        | <b>630</b>                    | 101 (97%)                 | 3 (3%)                      | <b>500</b>                 | 82 (79%)               |
| Panama              | 190        | <b>630</b>                    | 179 (94%)                 | 11 (6%)                     | <b>500</b>                 | 143 (75%)              |
| Paraguay            | 98         | <b>630</b>                    | 93 (95%)                  | 5 (5%)                      | <b>500</b>                 | 86 (88%)               |
| Peru                | 91         | <b>630</b>                    | 82 (90%)                  | 9 (10%)                     | <b>500</b>                 | 75 (82%)               |
| Trinidad and Tobago | 112        | <b>630</b>                    | 97 (87%)                  | 15 (13%)                    | <b>500</b>                 | 78 (70%)               |
| Barbados            | 113        | <b>630</b>                    | 102 (90%)                 | 11 (10%)                    | <b>500</b>                 | 80 (71%)               |
|                     |            |                               |                           |                             |                            |                        |
| <b>Butter</b>       | <b>507</b> |                               | <b>428 (84%)</b>          | <b>79 (16%)</b>             |                            | <b>186 (37%)</b>       |
| Argentina           | 23         | <b>800</b>                    | 23 (100%)                 | 0 (0%)                      | <b>500</b>                 | 19 (83%)               |
| Brazil              | 50         | <b>800</b>                    | 36 (72%)                  | 14 (28%)                    | <b>500</b>                 | 11 (22%)               |
| Chile               | 50         | <b>800</b>                    | 47 (94%)                  | 3 (6%)                      | <b>500</b>                 | 17 (34%)               |
| Costa Rica          | 43         | <b>800</b>                    | 35 (81%)                  | 8 (19%)                     | <b>500</b>                 | 17 (40%)               |
| Cuba                | 1          | <b>800</b>                    | 1 (100%)                  | 0 (0%)                      | <b>500</b>                 | 0 (0%)                 |
| Ecuador             | 32         | <b>800</b>                    | 22 (69%)                  | 10 (31%)                    | <b>500</b>                 | 15 (47%)               |
| Guatemala           | 68         | <b>800</b>                    | 58 (85%)                  | 10 (15%)                    | <b>500</b>                 | 21 (31%)               |
| Jamaica             | 30         | <b>800</b>                    | 26 (87%)                  | 4 (13%)                     | <b>500</b>                 | 6 (20%)                |
| Mexico              | 46         | <b>800</b>                    | 44 (96%)                  | 2 (4%)                      | <b>500</b>                 | 34 (74%)               |
| Panama              | 51         | <b>800</b>                    | 45 (88%)                  | 6 (12%)                     | <b>500</b>                 | 10 (20%)               |
| Paraguay            | 17         | <b>800</b>                    | 14 (82%)                  | 3 (18%)                     | <b>500</b>                 | 9 (53%)                |
| Peru                | 18         | <b>800</b>                    | 10 (56%)                  | 8 (44%)                     | <b>500</b>                 | 6 (33%)                |
| Trinidad and Tobago | 28         | <b>800</b>                    | 20 (71%)                  | 8 (29%)                     | <b>500</b>                 | 6 (21%)                |

Supplementary Materials for “Sodium levels in packaged foods sold in 14 Latin American and Caribbean countries”

|                                         | n           | Regional Target (mg Na/100 g) | % Meeting Regional Target | % Exceeding Regional Target | Lower Target (mg Na/100 g) | % Meeting Lower Target |
|-----------------------------------------|-------------|-------------------------------|---------------------------|-----------------------------|----------------------------|------------------------|
| Barbados                                | 50          | <b>800</b>                    | 47 (94%)                  | 3 (6%)                      | <b>500</b>                 | 15 (30%)               |
|                                         |             |                               |                           |                             |                            |                        |
| <b>Snacks</b>                           | <b>2235</b> |                               | <b>1674 (75%)</b>         | <b>561 (25%)</b>            |                            | <b>865 (39%)</b>       |
| Argentina                               | 123         | <b>900</b>                    | 93 (76%)                  | 30 (25%)                    | <b>530</b>                 | 45 (37%)               |
| Brazil                                  | 198         | <b>900</b>                    | 130 (66%)                 | 68 (34%)                    | <b>530</b>                 | 54 (27%)               |
| Chile                                   | 132         | <b>900</b>                    | 126 (95%)                 | 6 (5%)                      | <b>530</b>                 | 85 (64%)               |
| Costa Rica                              | 206         | <b>900</b>                    | 149 (72%)                 | 57 (28%)                    | <b>530</b>                 | 77 (37%)               |
| Cuba                                    | 14          | <b>900</b>                    | 13 (93%)                  | 1 (7%)                      | <b>530</b>                 | 4 (29%)                |
| Ecuador                                 | 187         | <b>900</b>                    | 157 (84%)                 | 30 (16%)                    | <b>530</b>                 | 102 (55%)              |
| Guatemala                               | 181         | <b>900</b>                    | 131 (72%)                 | 50 (28%)                    | <b>530</b>                 | 68 (38%)               |
| Jamaica                                 | 147         | <b>900</b>                    | 108 (73%)                 | 39 (27%)                    | <b>530</b>                 | 62 (42%)               |
| Mexico                                  | 211         | <b>900</b>                    | 150 (71%)                 | 61 (29%)                    | <b>530</b>                 | 57 (27%)               |
| Panama                                  | 207         | <b>900</b>                    | 139 (67%)                 | 68 (33%)                    | <b>530</b>                 | 74 (38%)               |
| Paraguay                                | 159         | <b>900</b>                    | 115 (72%)                 | 44 (28%)                    | <b>530</b>                 | 60 (38%)               |
| Peru                                    | 116         | <b>900</b>                    | 102 (88%)                 | 14 (12%)                    | <b>530</b>                 | 55 (47%)               |
| Trinidad and Tobago                     | 152         | <b>900</b>                    | 111 (73%)                 | 41 (27%)                    | <b>530</b>                 | 58 (38%)               |
| Barbados                                | 202         | <b>900</b>                    | 150 (74%)                 | 52 (26%)                    | <b>530</b>                 | 64 (32%)               |
|                                         |             |                               |                           |                             |                            |                        |
| <b>Pasta and Noodles -dry, uncooked</b> | <b>696</b>  |                               | <b>681 (98%)</b>          | <b>15 (2%)</b>              |                            | <b>609 (88%)</b>       |
| Argentina                               | 96          | <b>1921</b>                   | 96 (100%)                 | 0 (0%)                      | <b>1333</b>                | 93 (97%)               |
| Brazil                                  | 50          | <b>1921</b>                   | 49 (98%)                  | 1 (2%)                      | <b>1333</b>                | 12 (24%)               |
| Chile                                   | 7           | <b>1921</b>                   | 7 (100%)                  | 0 (0%)                      | <b>1333</b>                | 4 (57%)                |
| Costa Rica                              | 48          | <b>1921</b>                   | 45 (94%)                  | 3 (6%)                      | <b>1333</b>                | 41 (85%)               |
| Cuba                                    | 30          | <b>1921</b>                   | 30 (100%)                 | 0 (0%)                      | <b>1333</b>                | 30 (100%)              |
| Ecuador                                 | 50          | <b>1921</b>                   | 47 (94%)                  | 3 (6%)                      | <b>1333</b>                | 47 (94%)               |
| Guatemala                               | 66          | <b>1921</b>                   | 66 (100%)                 | 0 (0%)                      | <b>1333</b>                | 63 (96%)               |
| Jamaica                                 | 19          | <b>1921</b>                   | 19 (100%)                 | 0 (0%)                      | <b>1333</b>                | 18 (95%)               |
| Mexico                                  | 24          | <b>1921</b>                   | 24 (100%)                 | 0 (0%)                      | <b>1333</b>                | 20 (83%)               |

Supplementary Materials for “Sodium levels in packaged foods sold in 14 Latin American and Caribbean countries”

|                                            | n          | Regional Target (mg Na/100 g) | % Meeting Regional Target | % Exceeding Regional Target | Lower Target (mg Na/100 g) | % Meeting Lower Target |
|--------------------------------------------|------------|-------------------------------|---------------------------|-----------------------------|----------------------------|------------------------|
| Panama                                     | 18         | <b>1921</b>                   | 15 (83%)                  | 3 (17%)                     | <b>1333</b>                | 14 (78%)               |
| Paraguay                                   | 7          | <b>1921</b>                   | 7 (100%)                  | 0 (0%)                      | <b>1333</b>                | 4 (57%)                |
| Peru                                       | 73         | <b>1921</b>                   | 72 (99%)                  | 1 (1%)                      | <b>1333</b>                | 72 (97%)               |
| Trinidad and Tobago                        | 46         | <b>1921</b>                   | 45 (98%)                  | 1 (2%)                      | <b>1333</b>                | 44 (96%)               |
| Barbados                                   | 49         | <b>1921</b>                   | 47 (96%)                  | 2 (4%)                      | <b>1333</b>                | 42 (86%)               |
|                                            |            |                               |                           |                             |                            |                        |
| <b>Pasta and Noodles-as consumed</b>       | <b>153</b> |                               | <b>140 (92%)</b>          | <b>13 (8%)</b>              |                            | <b>134 (88%)</b>       |
| Argentina                                  | 0          | <b>640</b>                    | 0 (0%)                    | 0 (0%)                      | <b>440</b>                 | 0 (0%)                 |
| Brazil                                     | 1          | <b>640</b>                    | 1 (100%)                  | 0 (0%)                      | <b>440</b>                 | 1 (100%)               |
| Chile                                      | 50         | <b>640</b>                    | 46 (92%)                  | 4(8%)                       | <b>440</b>                 | 45 (90%)               |
| Costa Rica                                 | 0          | <b>640</b>                    | 0(0%)                     | 0(0%)                       | <b>440</b>                 | 0 (0%)                 |
| Cuba                                       | 0          | <b>640</b>                    | 0 (0%)                    | 0 (0%)                      | <b>440</b>                 | 0 (0%)                 |
| Ecuador                                    | 0          | <b>640</b>                    | 0(0%)                     | 0 (0%)                      | <b>440</b>                 | 0 (0%)                 |
| Guatemala                                  | 0          | <b>640</b>                    | 0 (0%)                    | 0 (0%)                      | <b>440</b>                 | 0 (0%)                 |
| Jamaica                                    | 12         | <b>640</b>                    | 7 (58%)                   | 5 (42%)                     | <b>440</b>                 | 7(58%)                 |
| Mexico                                     | 22         | <b>640</b>                    | 21 (95%)                  | 1(5%)                       | <b>440</b>                 | 20 (91%)               |
| Pasta and Noodles, as consumed             | 46         | <b>640</b>                    | 43 (93%)                  | 3 (7%)                      | <b>440</b>                 | 40 (87%)               |
| Paraguay                                   | 0          | <b>640</b>                    | 0(0%)                     | 0(0%)                       | <b>440</b>                 | 0(0%)                  |
| Peru                                       | 0          | <b>640</b>                    | 0(0%)                     | 0(0%)                       | <b>440</b>                 | 0(0%)                  |
| Trinidad and Tobago                        | 14         | <b>640</b>                    | 14 (100%)                 | 0(0%)                       | <b>440</b>                 | 13 (93%)               |
| Barbados                                   | 8          | <b>640</b>                    | 8 (100%)                  | 0(0%)                       | <b>440</b>                 | 8 (100%)               |
|                                            |            |                               |                           |                             |                            |                        |
| <b>Seasonings for Side and Main Dishes</b> | <b>390</b> |                               | <b>375 (96%)</b>          | <b>15 (4%)</b>              |                            | <b>286 (73%)</b>       |
| Argentina                                  | 22         | <b>33100</b>                  | 22 (100%)                 | 0 (0%)                      | <b>9100</b>                | 18 (82%)               |
| Brazil                                     | 2          | <b>33100</b>                  | 2 (100%)                  | 0 (0%)                      | <b>9100</b>                | 0 (0%)                 |
| Chile                                      | 63         | <b>33100</b>                  | 63 (100%)                 | 0(0%)                       | <b>9100</b>                | 45 (71%)               |

Supplementary Materials for “Sodium levels in packaged foods sold in 14 Latin American and Caribbean countries”

|                                 | n          | Regional Target (mg Na/100 g) | % Meeting Regional Target | % Exceeding Regional Target | Lower Target (mg Na/100 g) | % Meeting Lower Target |
|---------------------------------|------------|-------------------------------|---------------------------|-----------------------------|----------------------------|------------------------|
| Costa Rica                      | 44         | <b>33100</b>                  | 44(100%)                  | 0(0%)                       | <b>9100</b>                | 24 (55%)               |
| Cuba                            | 12         | <b>33100</b>                  | 12(100%)                  | 0(0%)                       | <b>9100</b>                | 11 (92%)               |
| Ecuador                         | 8          | <b>33100</b>                  | 8(100%)                   | 0(0%)                       | <b>9100</b>                | 8(100%)                |
| Guatemala                       | 6          | <b>33100</b>                  | 6(100%)                   | 0(0%)                       | <b>9100</b>                | 5 (83%)                |
| Jamaica                         | 13         | <b>33100</b>                  | 13(100%)                  | 0(0%)                       | <b>9100</b>                | 12 (92%)               |
| Mexico                          | 31         | <b>33100</b>                  | 31(100%)                  | 0(0%)                       | <b>9100</b>                | 16 (52%)               |
| Panama                          | 41         | <b>33100</b>                  | 41(100%)                  | 0(0%)                       | <b>9100</b>                | 41(100%)               |
| Paraguay                        | 28         | <b>33100</b>                  | 24(86%)                   | 4 (14%)                     | <b>9100</b>                | 5 (18%)                |
| Peru                            | 51         | <b>33100</b>                  | 51(100%)                  | 0(0%)                       | <b>9100</b>                | 44 (86%)               |
| Trinidad and Tobago             | 51         | <b>33100</b>                  | 40 (78%)                  | 11 (22%)                    | <b>9100</b>                | 40 (78%)               |
| Barbados                        | 18         | <b>33100</b>                  | 18 (100%)                 | 0(0%)                       | <b>9100</b>                | 17 (94%)               |
|                                 |            |                               |                           |                             |                            |                        |
| <b>Meat and Fish Seasonings</b> | <b>435</b> |                               | <b>385 (89%)</b>          | <b>50 (11%)</b>             |                            | <b>381 (88%)</b>       |
| Argentina                       | 26         | <b>23000</b>                  | 23 (0%)                   | 3 (12%)                     | <b>21775</b>               | 23 (89%)               |
| Brazil                          | 48         | <b>23000</b>                  | 29 (60%)                  | 19 (40%)                    | <b>21775</b>               | 27 (57%)               |
| Chile                           | 2          | <b>23000</b>                  | 2(100%)                   | 0 (0%)                      | <b>21775</b>               | 2(100%)                |
| Costa Rica                      | 15         | <b>23000</b>                  | 15(100%)                  | 0(0%)                       | <b>21775</b>               | 15(100%)               |
| Cuba                            | 4          | <b>23000</b>                  | 4(100%)                   | 0(0%)                       | <b>21775</b>               | 4(100%)                |
| Ecuador                         | 54         | <b>23000</b>                  | 51 (94%)                  | 3(6%)                       | <b>21775</b>               | 51 (94%)               |
| Guatemala                       | 34         | <b>23000</b>                  | 34 (100%)                 | 0(0%)                       | <b>21775</b>               | 34 (100%)              |
| Jamaica                         | 46         | <b>23000</b>                  | 38 (83%)                  | 8 (17%)                     | <b>21775</b>               | 37 (80%)               |
| Mexico                          | 61         | <b>23000</b>                  | 51 (84%)                  | 10 (16%)                    | <b>21775</b>               | 50 (82%)               |
| Panama                          | 38         | <b>23000</b>                  | 37 (97%)                  | 1 (3%)                      | <b>21775</b>               | 37 (97%)               |
| Paraguay                        | 6          | <b>23000</b>                  | 3 (50%)                   | 3 (50%)                     | <b>21775</b>               | 3(50%)                 |
| Peru                            | 11         | <b>23000</b>                  | 11(100%)                  | 0(0%)                       | <b>21775</b>               | 11(100%)               |
| Trinidad and Tobago             | 20         | <b>23000</b>                  | 19 (95%)                  | 1 (5%)                      | <b>21775</b>               | 19 (95%)               |
| Barbados                        | 70         | <b>23000</b>                  | 68 (97%)                  | 2 (3%)                      | <b>21775</b>               | 68 (97%)               |
|                                 |            |                               |                           |                             |                            |                        |

Supplementary Materials for “Sodium levels in packaged foods sold in 14 Latin American and Caribbean countries”

|                                                | n          | Regional Target (mg Na/100 g) | % Meeting Regional Target | % Exceeding Regional Target | Lower Target (mg Na/100 g) | % Meeting Lower Target |
|------------------------------------------------|------------|-------------------------------|---------------------------|-----------------------------|----------------------------|------------------------|
| <b>Bouillon Cubes and Powders, as consumed</b> | <b>258</b> |                               | <b>159 (62%)</b>          | <b>99 (38%)</b>             |                            | <b>96 (37%)</b>        |
| Argentina                                      | 23         | <b>20500</b>                  | 14 (62%)                  | 9 (39%)                     | <b>18000</b>               | 7 (31%)                |
| Brazil                                         | 57         | <b>20500</b>                  | 34 (60%)                  | 23 (40%)                    | <b>18000</b>               | 23 (41%)               |
| Chile                                          | 20         | <b>20500</b>                  | 12 (60%)                  | 8 (40%)                     | <b>18000</b>               | 6 (30%)                |
| Costa Rica                                     | 26         | <b>20500</b>                  | 16 (62%)                  | 10 (38%)                    | <b>18000</b>               | 10(38%)                |
| Cuba                                           | 7          | <b>20500</b>                  | 6 (86%)                   | 1 (14%)                     | <b>18000</b>               | 4 (57%)                |
| Ecuador                                        | 14         | <b>20500</b>                  | 13 (93%)                  | 1 (7%)                      | <b>18000</b>               | 10 (71%)               |
| Guatemala                                      | 10         | <b>20500</b>                  | 7(70%)                    | 3 (30%)                     | <b>18000</b>               | 4 (10%)                |
| Jamaica                                        | 7          | <b>20500</b>                  | 6 (86%)                   | 1 (14%)                     | <b>18000</b>               | 4(57%)                 |
| Mexico                                         | 32         | <b>20500</b>                  | 18 (56%)                  | 14 (44%)                    | <b>18000</b>               | 9 (28%)                |
| Panama                                         | 0          | <b>20500</b>                  | 0(0%)                     | 0(0%)                       | <b>18000</b>               | 0(0%)                  |
| Paraguay                                       | 6          | <b>20500</b>                  | 5 (83%)                   | 1(17%)                      | <b>18000</b>               | 1 (17%)                |
| Peru                                           | 24         | <b>20500</b>                  | 8 (33%)                   | 16 (67%)                    | <b>18000</b>               | 5(21%)                 |
| Trinidad and Tobago                            | 6          | <b>20500</b>                  | 3 (50%)                   | 3 (50%)                     | <b>18000</b>               | 3 (50%)                |
| Barbados                                       | 26         | <b>20500</b>                  | 17 (65%)                  | 9 (34%)                     | <b>18000</b>               | 10 (38%)               |

Data presented as n (%).

**Table S5. Detailed assessment of the proportion of foods meeting the Regional Sodium Targets by Country**

|                                     | n           | Regional Target (mg Na/100 g) | % Meeting Regional Target | % Exceeding Regional Target | Lower Target (mg Na/100 g) | % Meeting Lower Target |
|-------------------------------------|-------------|-------------------------------|---------------------------|-----------------------------|----------------------------|------------------------|
| <b>Argentina</b>                    | <b>1125</b> |                               | <b>940 (84%)</b>          | <b>185 (16%)</b>            |                            | <b>508 (45%)</b>       |
| Wet and Dry Soups                   | 79          | <b>360</b>                    | 51 (65%)                  | 28 (35%)                    | <b>306</b>                 | 30 (38%)               |
| Noodles in Broth                    | 0           | <b>430</b>                    | 0 (0%)                    | 0 (0%)                      | <b>360</b>                 | 0 (0%)                 |
| Meats and Sausages                  | 162         | <b>1210</b>                   | 143 (88%)                 | 19 (12%)                    | <b>690</b>                 | 20 (12%)               |
| Cured and Preserved Meats           | 28          | <b>1900</b>                   | 20 (72%)                  | 8 (28%)                     | <b>1350</b>                | 10 (36%)               |
| Breaded meat and poultry            | 22          | <b>735</b>                    | 22 (100%)                 | 0 (0%)                      | <b>470</b>                 | 6 (27%)                |
| Bread                               | 123         | <b>600</b>                    | 91 (74%)                  | 32 (26%)                    | <b>400</b>                 | 41 (33%)               |
| Mayonnaise                          | 18          | <b>1050</b>                   | 17 (95%)                  | 1 (6%)                      | <b>670</b>                 | 3 (17%)                |
| Cookies and Sweet Cookies           | 98          | <b>485</b>                    | 94 (96%)                  | 4 (4%)                      | <b>265</b>                 | 54 (55%)               |
| Flavored Cookies and Crackers       | 67          | <b>1340</b>                   | 66 (98%)                  | 1 (2%)                      | <b>700</b>                 | 45 (67%)               |
| Cakes                               | 127         | <b>400</b>                    | 89 (70%)                  | 38 (30%)                    | <b>205</b>                 | 31 (24%)               |
| Breakfast Cereals                   | 88          | <b>630</b>                    | 76 (87%)                  | 12 (14%)                    | <b>500</b>                 | 63 (72%)               |
| Butter                              | 23          | <b>800</b>                    | 23 (100%)                 | 0 (0%)                      | <b>500</b>                 | 19 (83%)               |
| Snacks                              | 123         | <b>900</b>                    | 93 (76%)                  | 30 (25%)                    | <b>530</b>                 | 45 (37%)               |
| Pasta and Noodles, uncooked         | 96          | <b>1921</b>                   | 96 (100%)                 | 0 (0%)                      | <b>1333</b>                | 93 (97%)               |
| Pasta and Noodles, as consumed      | 0           | <b>640</b>                    | 0 (0%)                    | 0 (0%)                      | <b>440</b>                 | 0 (0%)                 |
| Seasonings for Side and Main Dishes | 22          | <b>33100</b>                  | 22 (100%)                 | 0 (0%)                      | <b>9100</b>                | 18 (82%)               |
| Meat and Fish Seasonings            | 26          | <b>23000</b>                  | 23 (0%)                   | 3 (12%)                     | <b>21775</b>               | 23 (89%)               |
| Bouillon Cubes and Powders          | 23          | <b>20500</b>                  | 14 (62%)                  | 9 (39%)                     | <b>18000</b>               | 7 (31%)                |
|                                     |             |                               |                           |                             |                            |                        |
| <b>Brazil</b>                       | <b>1224</b> |                               | <b>944 (77%)</b>          | <b>280 (23%)</b>            |                            | <b>483 (39%)</b>       |
| Wet and Dry Soups                   | 73          | <b>360</b>                    | 49 (67%)                  | 24 (33%)                    | <b>306</b>                 | 38 (52%)               |
| Noodles in Broth                    | 7           | <b>430</b>                    | 7 (100%)                  | 0 (0%)                      | <b>360</b>                 | 4 (57%)                |
| Meats and Sausages                  | 162         | <b>1210</b>                   | 120 (74%)                 | 42 (26%)                    | <b>690</b>                 | 20 (12%)               |
| Cured and Preserved Meats           | 13          | <b>1900</b>                   | 10 (77%)                  | 3 (23%)                     | <b>1350</b>                | 4 (31%)                |
| Breaded meat and poultry            | 25          | <b>735</b>                    | 9 (36%)                   | 16 (64%)                    | <b>470</b>                 | 2 (8%)                 |
| Bread                               | 101         | <b>600</b>                    | 93 (93%)                  | 8 (8%)                      | <b>400</b>                 | 47 (47%)               |
| Mayonnaise                          | 33          | <b>1050</b>                   | 29 (88%)                  | 4 (12%)                     | <b>670</b>                 | 5 (15%)                |
| Cookies and Sweet Cookies           | 110         | <b>485</b>                    | 110 (100%)                | 0 (0%)                      | <b>265</b>                 | 67 (61%)               |
| Flavored Cookies and Crackers       | 40          | <b>1340</b>                   | 38 (95%)                  | 2 (5%)                      | <b>700</b>                 | 33 (83%)               |

Supplementary Materials for “Sodium levels in packaged foods sold in 14 Latin American and Caribbean countries”

|                                     | n           | Regional Target (mg Na/100 g) | % Meeting Regional Target | % Exceeding Regional Target | Lower Target (mg Na/100 g) | % Meeting Lower Target |
|-------------------------------------|-------------|-------------------------------|---------------------------|-----------------------------|----------------------------|------------------------|
| Cakes                               | 154         | <b>400</b>                    | 104 (68%)                 | 50 (32%)                    | <b>205</b>                 | 43 (28%)               |
| Breakfast Cereals                   | 100         | <b>630</b>                    | 94 (94%)                  | 6 (6%)                      | <b>500</b>                 | 92 (92%)               |
| Butter                              | 50          | <b>800</b>                    | 36 (72%)                  | 14 (28%)                    | <b>500</b>                 | 11 (22%)               |
| Snacks                              | 198         | <b>900</b>                    | 130 (66%)                 | 68 (34%)                    | <b>530</b>                 | 54 (27%)               |
| Pasta and Noodles, uncooked         | 50          | <b>1921</b>                   | 49 (98%)                  | 1 (2%)                      | <b>1333</b>                | 12 (24%)               |
| Pasta and Noodles, as consumed      | 1           | <b>640</b>                    | 1 (100%)                  | 0 (0%)                      | <b>440</b>                 | 1 (100%)               |
| Seasonings for Side and Main Dishes | 2           | <b>33100</b>                  | 2 (100%)                  | 0 (0%)                      | <b>9100</b>                | 0 (0%)                 |
| Meat and Fish Seasonings            | 48          | <b>23000</b>                  | 29 (60%)                  | 19 (40%)                    | <b>21775</b>               | 27 (57%)               |
| Bouillon Cubes and Powders          | 57          | <b>20500</b>                  | 34 (60%)                  | 23 (40%)                    | <b>18000</b>               | 23 (41%)               |
|                                     |             |                               |                           |                             |                            |                        |
| <b>Chile</b>                        | <b>1178</b> |                               | <b>1087 (92%)</b>         | <b>91 (8%)</b>              |                            | <b>652 (55%)</b>       |
| Wet and Dry Soups                   | 69          | <b>360</b>                    | 47 (68%)                  | 22 (32%)                    | <b>306</b>                 | 44 (64%)               |
| Noodles in Broth                    | 12          | <b>430</b>                    | 12(100%)                  | 0 (0%)                      | <b>360</b>                 | 11 (92%)               |
| Meats and Sausages                  | 164         | <b>1210</b>                   | 146 (89%)                 | 18 (11%)                    | <b>690</b>                 | 25 (15%)               |
| Cured and Preserved Meats           | 37          | <b>1900</b>                   | 34 (92%)                  | 3 (8%)                      | <b>1350</b>                | 10 (27%)               |
| Breaded meat and poultry            | 18          | <b>735</b>                    | 16 (89%)                  | 2 (11%)                     | <b>470</b>                 | 10 (56%)               |
| Bread                               | 106         | <b>600</b>                    | 99 (93%)                  | 7 (7%)                      | <b>400</b>                 | 48 (46%)               |
| Mayonnaise                          | 30          | <b>1050</b>                   | 30 (100%)                 | 0 (0%)                      | <b>670</b>                 | 12 (40%)               |
| Cookies and Sweet Cookies           | 106         | <b>485</b>                    | 106 (100%)                | 0 (0%)                      | <b>265</b>                 | 64 (61%)               |
| Flavored Cookies and Crackers       | 46          | <b>1340</b>                   | 45 (98%)                  | 1 (2%)                      | <b>700</b>                 | 37 (81%)               |
| Cakes                               | 157         | <b>400</b>                    | 141 (90%)                 | 16 (10%)                    | <b>205</b>                 | 86 (55%)               |
| Breakfast Cereals                   | 109         | <b>630</b>                    | 108 (99%)                 | 1 (1%)                      | <b>500</b>                 | 101 (93%)              |
| Butter                              | 50          | <b>800</b>                    | 47 (94%)                  | 3 (6%)                      | <b>500</b>                 | 17 (34%)               |
| Snacks                              | 132         | <b>900</b>                    | 126 (95%)                 | 6 (5%)                      | <b>530</b>                 | 85 (65%)               |
| Pasta and Noodles, uncooked         | 7           | <b>1921</b>                   | 7 (100%)                  | 0 (0%)                      | <b>1333</b>                | 4 (57%)                |
| Pasta and Noodles, as consumed      | 50          | <b>640</b>                    | 46 (92%)                  | 4 (8%)                      | <b>440</b>                 | 45 (90%)               |
| Seasonings for Side and Main Dishes | 63          | <b>33100</b>                  | 63 (100%)                 | 0 (0%)                      | <b>9100</b>                | 45 (72%)               |
| Meat and Fish Seasonings            | 2           | <b>23000</b>                  | 2 (100%)                  | 0 (0%)                      | <b>21775</b>               | 2 (100%)               |
| Bouillon Cubes and Powders          | 20          | <b>20500</b>                  | 12 (60%)                  | 8 (40%)                     | <b>18000</b>               | 6 (30%)                |
|                                     |             |                               |                           |                             |                            |                        |

Supplementary Materials for “Sodium levels in packaged foods sold in 14 Latin American and Caribbean countries”

|                                     | n           | Regional Target (mg Na/100 g) | % Meeting Regional Target | % Exceeding Regional Target | Lower Target (mg Na/100 g) | % Meeting Lower Target |
|-------------------------------------|-------------|-------------------------------|---------------------------|-----------------------------|----------------------------|------------------------|
| <b>Costa Rica</b>                   | <b>1086</b> |                               | <b>834 (77%)</b>          | <b>252 (23%)</b>            |                            | <b>460(43%)</b>        |
| Wet and Dry Soups                   | 71          | <b>360</b>                    | 34 (48%)                  | 37 (52%)                    | <b>306</b>                 | 23 (32%)               |
| Noodles in Broth                    | 13          | <b>430</b>                    | 8 (61%)                   | 5 (39%)                     | <b>360</b>                 | 5 (39%)                |
| Meats and Sausages                  | 60          | <b>1210</b>                   | 42 (70%)                  | 18 (30%)                    | <b>690</b>                 | 19 (32%)               |
| Cured and Preserved Meats           | 0           | <b>1900</b>                   | 0 (0%)                    | 0 (0%)                      | <b>1350</b>                | 0 (0%)                 |
| Breaded meat and poultry            | 41          | <b>735</b>                    | 17 (41%)                  | 24 (59%)                    | <b>470</b>                 | 4 (10%)                |
| Bread                               | 83          | <b>600</b>                    | 62 (75%)                  | 21 (25%)                    | <b>400</b>                 | 30 (36%)               |
| Mayonnaise                          | 34          | <b>1050</b>                   | 34 (100%)                 | 0 (0%)                      | <b>670</b>                 | 9 (27%)                |
| Cookies and Sweet Cookies           | 127         | <b>485</b>                    | 118 (93%)                 | 9 (7%)                      | <b>265</b>                 | 62 (49%)               |
| Flavored Cookies and Crackers       | 43          | <b>1340</b>                   | 38 (88%)                  | 5 (12%)                     | <b>700</b>                 | 14 (32%)               |
| Cakes                               | 117         | <b>400</b>                    | 78 (67%)                  | 39 (33%)                    | <b>205</b>                 | 32 (28%)               |
| Breakfast Cereals                   | 115         | <b>630</b>                    | 99 (86%)                  | 16 (14%)                    | <b>500</b>                 | 78 (68%)               |
| Butter                              | 43          | <b>800</b>                    | 35 (81%)                  | 8 (19%)                     | <b>500</b>                 | 17 (40%)               |
| Snacks                              | 206         | <b>900</b>                    | 149 (72%)                 | 57 (28%)                    | <b>530</b>                 | 77 (38%)               |
| Pasta and Noodles, uncooked         | 48          | <b>1921</b>                   | 45 (94%)                  | 3 (6%)                      | <b>1333</b>                | 41 (85%)               |
| Pasta and Noodles, as consumed      | 0           | <b>640</b>                    | 0 (0%)                    | 0 (0%)                      | <b>440</b>                 | 0 (0%)                 |
| Seasonings for Side and Main Dishes | 44          | <b>33100</b>                  | 44 (100%)                 | 0 (0%)                      | <b>9100</b>                | 24 (56%)               |
| Meat and Fish Seasonings            | 15          | <b>23000</b>                  | 15 (100%)                 | 0 (0%)                      | <b>21775</b>               | 15 (100%)              |
| Bouillon Cubes and Powders          | 26          | <b>20500</b>                  | 16 (62%)                  | 10 (38%)                    | <b>18000</b>               | 10 (39%)               |
|                                     |             |                               |                           |                             |                            |                        |
| <b>Cuba</b>                         | <b>209</b>  |                               | <b>188 (90%)</b>          | <b>21(10%)</b>              |                            | <b>124 (59%)</b>       |
| Wet and Dry Soups                   | 16          | <b>360</b>                    | 13 (81%)                  | 3 (19%)                     | <b>306</b>                 | 12 (75%)               |
| Noodles in Broth                    | 1           | <b>430</b>                    | 1 (100%)                  | 0 (0%)                      | <b>360</b>                 | 1 (100%)               |
| Meats and Sausages                  | 26          | <b>1210</b>                   | 22 (85%)                  | 4 (15%)                     | <b>690</b>                 | 10 (39%)               |
| Cured and Preserved Meats           | 4           | <b>1900</b>                   | 3 (75%)                   | 1 (25%)                     | <b>1350</b>                | 2 (50%)                |
| Breaded meat and poultry            | 4           | <b>735</b>                    | 4 (100%)                  | 0 (0%)                      | <b>470</b>                 | 4 (100%)               |
| Bread                               | 24          | <b>600</b>                    | 17 (71%)                  | 7 (29%)                     | <b>400</b>                 | 1 (4%)                 |
| Mayonnaise                          | 6           | <b>1050</b>                   | 6 (100%)                  | 0 (0%)                      | <b>670</b>                 | 5 (84%)                |
| Cookies and Sweet Cookies           | 21          | <b>485</b>                    | 21 (100%)                 | 0 (0%)                      | <b>265</b>                 | 13 (62%)               |
| Flavored Cookies and Crackers       | 8           | <b>1340</b>                   | 8 (100%)                  | 0 (0%)                      | <b>700</b>                 | 7 (88%)                |
| Cakes                               | 8           | <b>400</b>                    | 8 (100%)                  | 0 (0%)                      | <b>205</b>                 | 2 (25%)                |
| Breakfast Cereals                   | 23          | <b>630</b>                    | 19 (83%)                  | 4 (17%)                     | <b>500</b>                 | 14 (61%)               |



Supplementary Materials for “Sodium levels in packaged foods sold in 14 Latin American and Caribbean countries”

|                                     | n           | Regional Target (mg Na/100 g) | % Meeting Regional Target | % Exceeding Regional Target | Lower Target (mg Na/100 g) | % Meeting Lower Target |
|-------------------------------------|-------------|-------------------------------|---------------------------|-----------------------------|----------------------------|------------------------|
| Butter                              | 1           | 800                           | 1 (100%)                  | 0 (0%)                      | 500                        | 0 (0%)                 |
| Snacks                              | 14          | 900                           | 13 (93%)                  | 1 (7%)                      | 530                        | 4 (29%)                |
| Pasta and Noodles, uncooked         | 30          | 1921                          | 30 (100%)                 | 0 (0%)                      | 1333                       | 30 (100%)              |
| Pasta and Noodles, as consumed      | 0           | 640                           | 0 (0%)                    | 0 (0%)                      | 440                        | 0 (0%)                 |
| Seasonings for Side and Main Dishes | 12          | 33100                         | 12 (100%)                 | 0 (0%)                      | 9100                       | 11 (92%)               |
| Meat and Fish Seasonings            | 4           | 23000                         | 4(100%)                   | 0 (0%)                      | 21775                      | 4 (100%)               |
| Bouillon Cubes and Powders          | 7           | 20500                         | 6 (86%)                   | 1 (14%)                     | 18000                      | 4 (57%)                |
|                                     |             |                               |                           |                             |                            |                        |
| <b>Ecuador</b>                      | <b>1177</b> |                               | <b>976 (83%)</b>          | <b>201 (17%)</b>            |                            | <b>604 (51%)</b>       |
| Wet and Dry Soups                   | 56          | 360                           | 10 (18%)                  | 46 (82%)                    | 306                        | 8 (14%)                |
| Noodles in Broth                    | 4           | 430                           | 1 (25%)                   | 3 (75%)                     | 360                        | 1 (25%)                |
| Meats and Sausages                  | 193         | 1210                          | 167 (87%)                 | 26 (13%)                    | 690                        | 31 (16%)               |
| Cured and Preserved Meats           | 11          | 1900                          | 9 (82%)                   | 2 (18%)                     | 1350                       | 6 (55%)                |
| Breaded meat and poultry            | 17          | 735                           | 10 (59%)                  | 7 (41%)                     | 470                        | 3 (18%)                |
| Bread                               | 106         | 600                           | 97 (92%)                  | 9 (9%)                      | 400                        | 38 (36%)               |
| Mayonnaise                          | 26          | 1050                          | 25 (96%)                  | 1 (4%)                      | 670                        | 20 (77%)               |
| Cookies and Sweet Cookies           | 146         | 485                           | 133 (92%)                 | 13 (9%)                     | 265                        | 97 (67%)               |
| Flavored Cookies and Crackers       | 38          | 1340                          | 38 (100%)                 | 0 (0%)                      | 700                        | 26 (69%)               |
| Cakes                               | 135         | 400                           | 95 (70%)                  | 40 (30%)                    | 205                        | 54 (40%)               |
| Breakfast Cereals                   | 100         | 630                           | 93 (93%)                  | 7 (7%)                      | 500                        | 87 (87%)               |
| Butter                              | 32          | 800                           | 22 (69%)                  | 10 (31%)                    | 500                        | 15 (47%)               |
| Snacks                              | 187         | 900                           | 157 (84%)                 | 30 (16%)                    | 530                        | 102 (55%)              |
| Pasta and Noodles, uncooked         | 50          | 1921                          | 47 (94%)                  | 3 (6%)                      | 1333                       | 47 (94%)               |
| Pasta and Noodles, as consumed      | 0           | 640                           | 0 (0%)                    | 0 (0%)                      | 440                        | 0 (0%)                 |
| Seasonings for Side and Main Dishes | 8           | 33100                         | 8 (100%)                  | 0 (0%)                      | 9100                       | 8 (100%)               |
| Meat and Fish Seasonings            | 54          | 23000                         | 51 (94%)                  | 3 (6%)                      | 21775                      | 51 (95%)               |
| Bouillon Cubes and Powders          | 14          | 20500                         | 13 (93%)                  | 1 (7%)                      | 18000                      | 10 (72%)               |
|                                     |             |                               |                           |                             |                            |                        |
| <b>Guatemala</b>                    | <b>944</b>  |                               | <b>734 (78%)</b>          | <b>207 (22%)</b>            |                            | <b>430 (46%)</b>       |
| Wet and Dry Soups                   | 49          | 360                           | 26 (53%)                  | 23 (47%)                    | 306                        | 12 (25%)               |
| Noodles in Broth                    | 30          | 430                           | 15 (50%)                  | 15 (50%)                    | 360                        | 8 (27%)                |

Supplementary Materials for “Sodium levels in packaged foods sold in 14 Latin American and Caribbean countries”

|                                     | n          | Regional Target (mg Na/100 g) | % Meeting Regional Target | % Exceeding Regional Target | Lower Target (mg Na/100 g) | % Meeting Lower Target |
|-------------------------------------|------------|-------------------------------|---------------------------|-----------------------------|----------------------------|------------------------|
| Meats and Sausages                  | 38         | 1210                          | 31 (82%)                  | 7 (18%)                     | 690                        | 6 (16%)                |
| Cured and Preserved Meats           | 16         | 1900                          | 14 (87%)                  | 2 (13%)                     | 1350                       | 13 (81%)               |
| Breaded meat and poultry            | 6          | 735                           | 1 (17%)                   | 5 (83%)                     | 470                        | 0 (0%)                 |
| Bread                               | 68         | 600                           | 57 (84%)                  | 11 (16%)                    | 400                        | 28 (41%)               |
| Mayonnaise                          | 29         | 1050                          | 25 (86%)                  | 4 (14%)                     | 670                        | 14 (48%)               |
| Cookies and Sweet Cookies           | 111        | 485                           | 94 (85%)                  | 17 (15%)                    | 265                        | 55 (50%)               |
| Flavored Cookies and Crackers       | 36         | 1340                          | 32 (89%)                  | 4 (11%)                     | 700                        | 18 (50%)               |
| Cakes                               | 96         | 400                           | 48 (50%)                  | 48 (50%)                    | 205                        | 18 (19%)               |
| Breakfast Cereals                   | 100        | 630                           | 89 (89%)                  | 11 (11%)                    | 500                        | 63 (63%)               |
| Butter                              | 68         | 800                           | 58 (86%)                  | 10 (15%)                    | 500                        | 21 (31%)               |
| Snacks                              | 181        | 900                           | 131 (73%)                 | 50 (28%)                    | 530                        | 68 (38%)               |
| Pasta and Noodles, uncooked         | 66         | 1921                          | 66 (100%)                 | 0 (0%)                      | 1333                       | 63 (96%)               |
| Pasta and Noodles, as consumed      | 0          | 640                           | 0 (0%)                    | 0 (0%)                      | 440                        | 0 (0%)                 |
| Seasonings for Side and Main Dishes | 6          | 33100                         | 6 (100%)                  | 0 (0%)                      | 9100                       | 5 (84%)                |
| Meat and Fish Seasonings            | 34         | 23000                         | 34 (100%)                 | 0 (0%)                      | 21775                      | 34 (100%)              |
| Bouillon Cubes and Powders          | 10         | 20500                         | 7 (70%)                   | 3 (30%)                     | 18000                      | 4 (40%)                |
|                                     |            |                               |                           |                             |                            |                        |
| <b>Jamaica</b>                      | <b>907</b> |                               | <b>731 (81%)</b>          | <b>176 (19%)</b>            |                            | <b>399 (44%)</b>       |
| Wet and Dry Soups                   | 58         | 360                           | 33 (57%)                  | 25 (43%)                    | 306                        | 26 (45%)               |
| Noodles in Broth                    | 32         | 430                           | 32 (100%)                 | 0 (0%)                      | 360                        | 21 (66%)               |
| Meats and Sausages                  | 68         | 1210                          | 60 (88%)                  | 8 (12%)                     | 690                        | 21 (31%)               |
| Cured and Preserved Meats           | 31         | 1900                          | 31 (100%)                 | 0 (0%)                      | 1350                       | 30 (97%)               |
| Breaded meat and poultry            | 1          | 735                           | 1 (100%)                  | 0 (0%)                      | 470                        | 1 (100%)               |
| Bread                               | 72         | 600                           | 66 (92%)                  | 6 (8%)                      | 400                        | 14 (20%)               |
| Mayonnaise                          | 11         | 1050                          | 11 (100%)                 | 0 (0%)                      | 670                        | 7 (64%)                |
| Cookies and Sweet Cookies           | 115        | 485                           | 103 (90%)                 | 12 (10%)                    | 265                        | 30 (26%)               |
| Flavored Cookies and Crackers       | 56         | 1340                          | 56 (100%)                 | 0 (0%)                      | 700                        | 27 (48%)               |
| Cakes                               | 75         | 400                           | 27 (36%)                  | 48 (64%)                    | 205                        | 4 (6%)                 |
| Breakfast Cereals                   | 114        | 630                           | 94 (82%)                  | 20 (18%)                    | 500                        | 72 (63%)               |
| Butter                              | 30         | 800                           | 26 (87%)                  | 4 (13%)                     | 500                        | 6 (20%)                |
| Snacks                              | 147        | 900                           | 108 (74%)                 | 39 (27%)                    | 530                        | 62 (42%)               |

Supplementary Materials for “Sodium levels in packaged foods sold in 14 Latin American and Caribbean countries”

|                                     | n           | Regional Target (mg Na/100 g) | % Meeting Regional Target | % Exceeding Regional Target | Lower Target (mg Na/100 g) | % Meeting Lower Target |
|-------------------------------------|-------------|-------------------------------|---------------------------|-----------------------------|----------------------------|------------------------|
| Pasta and Noodles, uncooked         | 19          | <b>1921</b>                   | 19 (100%)                 | 0 (0%)                      | <b>1333</b>                | 18 (95%)               |
| Pasta and Noodles, as consumed      | 12          | <b>640</b>                    | 7 (58%)                   | 5 (42%)                     | <b>440</b>                 | 7 (58%)                |
| Seasonings for Side and Main Dishes | 13          | <b>33100</b>                  | 13 (100%)                 | 0 (0%)                      | <b>9100</b>                | 12 (93%)               |
| Meat and Fish Seasonings            | 46          | <b>23000</b>                  | 38 (83%)                  | 8 (18%)                     | <b>21775</b>               | 37 (81%)               |
| Bouillon Cubes and Powders          | 7           | <b>20500</b>                  | 6 (86%)                   | 1 (14%)                     | <b>18000</b>               | 4 (57%)                |
|                                     |             |                               |                           |                             |                            |                        |
| <b>Mexico</b>                       | <b>1267</b> |                               | <b>1043 (82%)</b>         | <b>224 (18%)</b>            |                            | <b>588 (46%)</b>       |
| Wet and Dry Soups                   | 80          | <b>360</b>                    | 54 (68%)                  | 26 (32%)                    | <b>306</b>                 | 42 (53%)               |
| Noodles in Broth                    | 0           | <b>430</b>                    | 0 (0%)                    | 0 (0%)                      | <b>360</b>                 | 0 (0%)                 |
| Meats and Sausages                  | 148         | <b>1210</b>                   | 138 (93%)                 | 10 (7%)                     | <b>690</b>                 | 38 (26%)               |
| Cured and Preserved Meats           | 49          | <b>1900</b>                   | 41 (84%)                  | 8 (16%)                     | <b>1350</b>                | 28 (57%)               |
| Breaded meat and poultry            | 17          | <b>735</b>                    | 13 (76%)                  | 4 (24%)                     | <b>470</b>                 | 8 (47%)                |
| Bread                               | 112         | <b>600</b>                    | 76 (68%)                  | 36 (32%)                    | <b>400</b>                 | 37 (33%)               |
| Mayonnaise                          | 37          | <b>1050</b>                   | 35 (95%)                  | 2 (5%)                      | <b>670</b>                 | 14 (38%)               |
| Cookies and Sweet Cookies           | 93          | <b>485</b>                    | 85 (91%)                  | 8 (9%)                      | <b>265</b>                 | 53 (57%)               |
| Flavored Cookies and Crackers       | 79          | <b>1340</b>                   | 77 (97%)                  | 2 (3%)                      | <b>700</b>                 | 58 (74%)               |
| Cakes                               | 121         | <b>400</b>                    | 84 (69%)                  | 37 (31%)                    | <b>205</b>                 | 22 (18%)               |
| Breakfast Cereals                   | 104         | <b>630</b>                    | 101 (97%)                 | 3 (3%)                      | <b>500</b>                 | 82 (79%)               |
| Butter                              | 46          | <b>800</b>                    | 44 (96%)                  | 2 (4%)                      | <b>500</b>                 | 34 (74%)               |
| Snacks                              | 211         | <b>900</b>                    | 150 (71%)                 | 61 (29%)                    | <b>530</b>                 | 57 (27%)               |
| Pasta and Noodles, uncooked         | 24          | <b>1921</b>                   | 24 (100%)                 | 0 (0%)                      | <b>1333</b>                | 20 (83%)               |
| Pasta and Noodles, as consumed      | 22          | <b>640</b>                    | 21 (96%)                  | 1 (5%)                      | <b>440</b>                 | 20 (91%)               |
| Seasonings for Side and Main Dishes | 31          | <b>33100</b>                  | 31 (100%)                 | 0 (0%)                      | <b>9100</b>                | 16 (52%)               |
| Meat and Fish Seasonings            | 61          | <b>23000</b>                  | 51 (84%)                  | 10 (16%)                    | <b>21775</b>               | 50 (82%)               |
| Bouillon Cubes and Powders          | 32          | <b>20500</b>                  | 18 (56%)                  | 14 (44%)                    | <b>18000</b>               | 9 (28%)                |
|                                     |             |                               |                           |                             |                            |                        |
| <b>Panama</b>                       | <b>1339</b> |                               | <b>1089 (81%)</b>         | <b>250 (19%)</b>            |                            | <b>607 (45%)</b>       |
| Wet and Dry Soups                   | 44          | <b>360</b>                    | 28 (64%)                  | 16 (36%)                    | <b>306</b>                 | 16 (36%)               |
| Noodles in Broth                    | 27          | <b>430</b>                    | 24 (89%)                  | 3 (11%)                     | <b>360</b>                 | 20 (74%)               |
| Meats and Sausages                  | 174         | <b>1210</b>                   | 155 (89%)                 | 19 (11%)                    | <b>690</b>                 | 74 (43%)               |

Supplementary Materials for “Sodium levels in packaged foods sold in 14 Latin American and Caribbean countries”

|                                     | n          | Regional Target (mg Na/100 g) | % Meeting Regional Target | % Exceeding Regional Target | Lower Target (mg Na/100 g) | % Meeting Lower Target |
|-------------------------------------|------------|-------------------------------|---------------------------|-----------------------------|----------------------------|------------------------|
| Cured and Preserved Meats           | 0          | <b>1900</b>                   | 0 (0%)                    | 0 (0%)                      | <b>1350</b>                | 0 (0%)                 |
| Breaded meat and poultry            | 13         | <b>735</b>                    | 10 (77%)                  | 3 (23%)                     | <b>470</b>                 | 6 (46%)                |
| Bread                               | 137        | <b>600</b>                    | 99 (72%)                  | 38 (28%)                    | <b>400</b>                 | 31 (23%)               |
| Mayonnaise                          | 25         | <b>1050</b>                   | 24 (96%)                  | 1 (4%)                      | <b>670</b>                 | 8 (32%)                |
| Cookies and Sweet Cookies           | 128        | <b>485</b>                    | 106 (83%)                 | 22 (17%)                    | <b>265</b>                 | 55 (43%)               |
| Flavored Cookies and Crackers       | 71         | <b>1340</b>                   | 70 (99%)                  | 1 (1%)                      | <b>700</b>                 | 28 (40%)               |
| Cakes                               | 129        | <b>400</b>                    | 74 (57%)                  | 55 (43%)                    | <b>205</b>                 | 20 (16%)               |
| Breakfast Cereals                   | 190        | <b>630</b>                    | 179 (94%)                 | 11 (6%)                     | <b>500</b>                 | 143 (75%)              |
| Butter                              | 51         | <b>800</b>                    | 45 (88%)                  | 6 (12%)                     | <b>500</b>                 | 10 (20%)               |
| Snacks                              | 207        | <b>900</b>                    | 139 (67%)                 | 68 (33%)                    | <b>530</b>                 | 74 (36%)               |
| Pasta and Noodles, uncooked         | 18         | <b>1921</b>                   | 15 (83%)                  | 3 (17%)                     | <b>1333</b>                | 14 (78%)               |
| Pasta and Noodles, as consumed      | 46         | <b>640</b>                    | 43 (93%)                  | 3 (7%)                      | <b>440</b>                 | 40 (87%)               |
| Seasonings for Side and Main Dishes | 41         | <b>33100</b>                  | 41 (100%)                 | 0 (0%)                      | <b>9100</b>                | 41 (100%)              |
| Meat and Fish Seasonings            | 38         | <b>23000</b>                  | 37 (97%)                  | 1 (3%)                      | <b>21775</b>               | 37 (98%)               |
| Bouillon Cubes and Powders          | 0          | <b>20500</b>                  | 0 (0%)                    | 0 (0%)                      | <b>18000</b>               | 0 (0%)                 |
|                                     |            |                               |                           |                             |                            |                        |
| <b>Paraguay</b>                     | <b>871</b> |                               | <b>756 (87%)</b>          | <b>115 (13%)</b>            |                            | <b>482 (55%)</b>       |
| Wet and Dry Soups                   | 28         | <b>360</b>                    | 22 (79%)                  | 6 (21%)                     | <b>306</b>                 | 19 (68%)               |
| Noodles in Broth                    | 3          | <b>430</b>                    | 3 (100%)                  | 0 (0%)                      | <b>360</b>                 | 3 (100%)               |
| Meats and Sausages                  | 109        | <b>1210</b>                   | 101 (93%)                 | 8 (7%)                      | <b>690</b>                 | 50 (46%)               |
| Cured and Preserved Meats           | 12         | <b>1900</b>                   | 12 (100%)                 | 0 (0%)                      | <b>1350</b>                | 8 (67%)                |
| Breaded meat and poultry            | 8          | <b>735</b>                    | 4 (50%)                   | 4 (50%)                     | <b>470</b>                 | 2 (25%)                |
| Bread                               | 76         | <b>600</b>                    | 67 (88%)                  | 9 (12%)                     | <b>400</b>                 | 34 (45%)               |
| Mayonnaise                          | 18         | <b>1050</b>                   | 17 (94%)                  | 1 (6%)                      | <b>670</b>                 | 1 (6%)                 |
| Cookies and Sweet Cookies           | 116        | <b>485</b>                    | 114 (98%)                 | 2 (2%)                      | <b>265</b>                 | 66 (57%)               |
| Flavored Cookies and Crackers       | 32         | <b>1340</b>                   | 32 (100%)                 | 0 (0%)                      | <b>700</b>                 | 21 (66%)               |
| Cakes                               | 35         | <b>400</b>                    | 11 (31%)                  | 24 (69%)                    | <b>205</b>                 | 5 (15%)                |
| Breakfast Cereals                   | 98         | <b>630</b>                    | 93 (95%)                  | 5 (5%)                      | <b>500</b>                 | 86 (88%)               |
| Butter                              | 17         | <b>800</b>                    | 14 (82%)                  | 3 (18%)                     | <b>500</b>                 | 9 (53%)                |
| Snacks                              | 159        | <b>900</b>                    | 115 (72%)                 | 44 (28%)                    | <b>530</b>                 | 60 (38%)               |
| Pasta and Noodles, uncooked         | 120        | <b>1921</b>                   | 119 (99%)                 | 1 (1%)                      | <b>1333</b>                | 109 (91%)              |

Supplementary Materials for “Sodium levels in packaged foods sold in 14 Latin American and Caribbean countries”

|                                     | n           | Regional Target (mg Na/100 g) | % Meeting Regional Target | % Exceeding Regional Target | Lower Target (mg Na/100 g) | % Meeting Lower Target |
|-------------------------------------|-------------|-------------------------------|---------------------------|-----------------------------|----------------------------|------------------------|
| Pasta and Noodles, as consumed      | 0           | <b>640</b>                    | 0 (0%)                    | 0 (0%)                      | <b>440</b>                 | 0 (0%)                 |
| Seasonings for Side and Main Dishes | 28          | <b>33100</b>                  | 24 (86%)                  | 4 (14%)                     | <b>9100</b>                | 5 (18%)                |
| Meat and Fish Seasonings            | 6           | <b>23000</b>                  | 3 (50%)                   | 3 (50%)                     | <b>21775</b>               | 3 (50%)                |
| Bouillon Cubes and Powders          | 6           | <b>20500</b>                  | 5 (83%)                   | 1 (17%)                     | <b>18000</b>               | 1 (17%)                |
|                                     |             |                               |                           |                             |                            |                        |
| <b>Peru</b>                         | <b>777</b>  |                               | <b>668 (86%)</b>          | <b>109 (14%)</b>            |                            | <b>434 (56%)</b>       |
| Wet and Dry Soups                   | 39          | <b>360</b>                    | 29 (74%)                  | 10 (26%)                    | <b>306</b>                 | 15 (39%)               |
| Noodles in Broth                    | 55          | <b>430</b>                    | 50 (91%)                  | 5 (9%)                      | <b>360</b>                 | 30 (55%)               |
| Meats and Sausages                  | 47          | <b>1210</b>                   | 42 (89%)                  | 5 (11%)                     | <b>690</b>                 | 27 (58%)               |
| Cured and Preserved Meats           | 1           | <b>1900</b>                   | 1 (100%)                  | 0 (0%)                      | <b>1350</b>                | 1 (100%)               |
| Breaded meat and poultry            | 1           | <b>735</b>                    | 1 (100%)                  | 0 (0%)                      | <b>470</b>                 | 0 (0%)                 |
| Bread                               | 68          | <b>600</b>                    | 53 (78%)                  | 15 (22%)                    | <b>400</b>                 | 16 (24%)               |
| Mayonnaise                          | 20          | <b>1050</b>                   | 18 (90%)                  | 2 (10%)                     | <b>670</b>                 | 8 (40%)                |
| Cookies and Sweet Cookies           | 91          | <b>485</b>                    | 82 (90%)                  | 9 (10%)                     | <b>265</b>                 | 40 (44%)               |
| Flavored Cookies and Crackers       | 38          | <b>1340</b>                   | 37 (97%)                  | 1 (3%)                      | <b>700</b>                 | 20 (53%)               |
| Cakes                               | 33          | <b>400</b>                    | 19 (57%)                  | 14 (43%)                    | <b>205</b>                 | 9 (27%)                |
| Breakfast Cereals                   | 91          | <b>630</b>                    | 82 (90%)                  | 9 (10%)                     | <b>500</b>                 | 75 (83%)               |
| Butter                              | 18          | <b>800</b>                    | 10 (56%)                  | 8 (44%)                     | <b>500</b>                 | 6 (34%)                |
| Snacks                              | 116         | <b>900</b>                    | 102 (88%)                 | 14 (12%)                    | <b>530</b>                 | 55 (48%)               |
| Pasta and Noodles, uncooked         | 73          | <b>1921</b>                   | 72 (99%)                  | 1 (1%)                      | <b>1333</b>                | 72 (99%)               |
| Pasta and Noodles, as consumed      | 0           | <b>640</b>                    | 0 (0%)                    | 0 (0%)                      | <b>440</b>                 | 0 (0%)                 |
| Seasonings for Side and Main Dishes | 51          | <b>33100</b>                  | 51 (100%)                 | 0 (0%)                      | <b>9100</b>                | 44 (87%)               |
| Meat and Fish Seasonings            | 11          | <b>23000</b>                  | 11 (100%)                 | 0 (0%)                      | <b>21775</b>               | 11 (100%)              |
| Bouillon Cubes and Powders          | 24          | <b>20500</b>                  | 8 (33%)                   | 16 (67%)                    | <b>18000</b>               | 5 (21%)                |
|                                     |             |                               |                           |                             |                            |                        |
| <b>Trinidad and Tobago</b>          | <b>1141</b> |                               | <b>899 (79%)</b>          | <b>242 (21%)</b>            |                            | <b>542 (48%)</b>       |
| Wet and Dry Soups                   | 75          | <b>360</b>                    | 35 (47%)                  | 40 (53%)                    | <b>306</b>                 | 24 (32%)               |
| Noodles in Broth                    | 23          | <b>430</b>                    | 16 (70%)                  | 7 (30%)                     | <b>360</b>                 | 10 (44%)               |
| Meats and Sausages                  | 45          | <b>1210</b>                   | 44 (98%)                  | 1 (2%)                      | <b>690</b>                 | 15 (34%)               |
| Cured and Preserved Meats           | 108         | <b>1900</b>                   | 105 (97%)                 | 3 (3%)                      | <b>1350</b>                | 100 (93%)              |
| Breaded meat and poultry            | 26          | <b>735</b>                    | 17 (65%)                  | 9 (35%)                     | <b>470</b>                 | 10 (39%)               |

Supplementary Materials for “Sodium levels in packaged foods sold in 14 Latin American and Caribbean countries”

|                                     | n           | Regional Target (mg Na/100 g) | % Meeting Regional Target | % Exceeding Regional Target | Lower Target (mg Na/100 g) | % Meeting Lower Target |
|-------------------------------------|-------------|-------------------------------|---------------------------|-----------------------------|----------------------------|------------------------|
| Bread                               | 95          | <b>600</b>                    | 87 (92%)                  | 8 (8%)                      | <b>400</b>                 | 36 (38%)               |
| Mayonnaise                          | 20          | <b>1050</b>                   | 19 (95%)                  | 1 (5%)                      | <b>670</b>                 | 12 (60%)               |
| Cookies and Sweet Cookies           | 190         | <b>485</b>                    | 145 (76%)                 | 45 (24%)                    | <b>265</b>                 | 57 (30%)               |
| Flavored Cookies and Crackers       | 3           | <b>1340</b>                   | 3 (100%)                  | 0 (0%)                      | <b>700</b>                 | 2 (67%)                |
| Cakes                               | 127         | <b>400</b>                    | 79 (62%)                  | 48 (38%)                    | <b>205</b>                 | 15 (12%)               |
| Breakfast Cereals                   | 112         | <b>630</b>                    | 97 (87%)                  | 15 (13%)                    | <b>500</b>                 | 78 (70%)               |
| Butter                              | 28          | <b>800</b>                    | 20 (71%)                  | 8 (29%)                     | <b>500</b>                 | 6 (22%)                |
| Snacks                              | 152         | <b>900</b>                    | 111 (73%)                 | 41 (27%)                    | <b>530</b>                 | 58 (38%)               |
| Pasta and Noodles, uncooked         | 46          | <b>1921</b>                   | 45 (98%)                  | 1 (2%)                      | <b>1333</b>                | 44 (96%)               |
| Pasta and Noodles, as consumed      | 14          | <b>640</b>                    | 14 (100%)                 | 0 (0%)                      | <b>440</b>                 | 13 (93%)               |
| Seasonings for Side and Main Dishes | 51          | <b>33100</b>                  | 40 (78%)                  | 11 (22%)                    | <b>9100</b>                | 40 (79%)               |
| Meat and Fish Seasonings            | 20          | <b>23000</b>                  | 19 (95%)                  | 1 (5%)                      | <b>21775</b>               | 19 (95%)               |
| Bouillon Cubes and Powders          | 6           | <b>20500</b>                  | 3 (50%)                   | 3 (50%)                     | <b>18000</b>               | 3 (50%)                |
|                                     |             |                               |                           |                             |                            |                        |
| <b>Barbados</b>                     | <b>1201</b> |                               | <b>979 (82%)</b>          | <b>220 (18%)</b>            |                            | <b>496 (41%)</b>       |
| Wet and Dry Soups                   | 80          | <b>360</b>                    | 54 (68%)                  | 26 (33%)                    | <b>306</b>                 | 44 (55%)               |
| Noodles in Broth                    | 0           | <b>430</b>                    | 0 (0%)                    | 0 (0%)                      | <b>360</b>                 | 0 (0%)                 |
| Meats and Sausages                  | 139         | <b>1210</b>                   | 118 (85%)                 | 21 (15%)                    | <b>690</b>                 | 22 (16%)               |
| Cured and Preserved Meats           | 10          | <b>1900</b>                   | 10 (100%)                 | 0 (0%)                      | <b>1350</b>                | 1 (10%)                |
| Breaded meat and poultry            | 17          | <b>735</b>                    | 16 (94%)                  | 1 (6%)                      | <b>470</b>                 | 4 (24%)                |
| Bread                               | 100         | <b>600</b>                    | 89 (89%)                  | 11 (11%)                    | <b>400</b>                 | 33 (33%)               |
| Mayonnaise                          | 30          | <b>1050</b>                   | 27 (90%)                  | 3 (10%)                     | <b>670</b>                 | 10 (34%)               |
| Cookies and Sweet Cookies           | 108         | <b>485</b>                    | 95 (88%)                  | 13 (12%)                    | <b>265</b>                 | 37 (35%)               |
| Flavored Cookies and Crackers       | 52          | <b>1340</b>                   | 51 (98%)                  | 1 (2%)                      | <b>700</b>                 | 26 (50%)               |
| Cakes                               | 129         | <b>400</b>                    | 62 (48%)                  | 67 (52%)                    | <b>205</b>                 | 15 (12%)               |
| Breakfast Cereals                   | 113         | <b>630</b>                    | 102 (90%)                 | 11 (10%)                    | <b>500</b>                 | 80 (71%)               |
| Butter                              | 50          | <b>800</b>                    | 47 (94%)                  | 3 (6%)                      | <b>500</b>                 | 15 (30%)               |
| Snacks                              | 202         | <b>900</b>                    | 150 (74%)                 | 52 (26%)                    | <b>530</b>                 | 64 (32%)               |
| Pasta and Noodles, uncooked         | 49          | <b>1921</b>                   | 47 (96%)                  | 2 (4%)                      | <b>1333</b>                | 42 (86%)               |
| Pasta and Noodles, as consumed      | 8           | <b>640</b>                    | 8 (100%)                  | 0 (0%)                      | <b>440</b>                 | 8 (100%)               |
| Seasonings for Side and Main Dishes | 18          | <b>33100</b>                  | 18 (100%)                 | 0 (0%)                      | <b>9100</b>                | 17 (95%)               |

Supplementary Materials for “Sodium levels in packaged foods sold in 14 Latin American and Caribbean countries”

|                            | n  | Regional Target (mg Na/100 g) | % Meeting Regional Target | % Exceeding Regional Target | Lower Target (mg Na/100 g) | % Meeting Lower Target |
|----------------------------|----|-------------------------------|---------------------------|-----------------------------|----------------------------|------------------------|
| Meat and Fish Seasonings   | 70 | <b>23000</b>                  | 68 (97%)                  | 2 (3%)                      | <b>21775</b>               | 68 (97%)               |
| Bouillon Cubes and Powders | 26 | <b>20500</b>                  | 17 (65%)                  | 9 (35%)                     | <b>18000</b>               | 10 (39%)               |

Data presented as n (%).
